# Supplementary material for: Alternative splicing and nonsense-mediated decay modulate expression of important regulatory genes in Arabidopsis
Source: PubMed Central journal article supplement — Nucleic Acids Res. 2011 Nov 29;40(6):2454–69. doi: 10.1093/nar/gkr932 (PMC3315328; doi:10.1093/nar/gkr932), 2011-11-29
Supplement: supp_gkr932_nar-01754-a-2011-File010.pdf [file supp_gkr932_nar-01754-a-2011-File010.pdf]

**Supplemental Table 1 – Primer pair number and primer sequences used to amplify alternative splicing events on RT-PCR panel with gene ID and localisation of AS event**

| Primer pair | Gene ID   | Localization | Primer Forward (labelled) | Primer Reverse          |
|-------------|-----------|--------------|---------------------------|-------------------------|
| 1           | At1g02840 | CDS/3'UTR    | GGCCCCCGCTCGAAGTCAAGG     | GGTAGAGGAGATCTTGATCTTG  |
| 2           | At1g04400 | 5'UTR        | GGAAGAAAGAAGAGTCAAG       | GGATTATCCTCAATCCTTAGG   |
| 3           | At1g09140 | CDS/3'UTR    | CCTGCTAGATCCATTTCCCC      | GATCTTGATCTTGATTTTG     |
| 7           | At1g55310 | CDS          | GGAAGTCGTTTGAGCAGTTTGG    | GGTTTCTTTCTGTTCTCTTCTG  |
| 12          | At1g72320 | 5'UTR/CDS    | CGTCAACTGTGTTTTGCATCC     | CATCAAATCCACGGTTACCC    |
| 13          | At1g79650 | CDS          | GGAGAACAAAGTTACGGAGG      | GGAACAGGTGAAGACTGGG     |
| 19          | At2g32330 | CDS          | CTTTTGAATGAGCACTCC        | CCGTAGGCAAAGGCAATATCC   |
| 21          | At2g37340 | 5'UTR/CDS    | GGACCCGAGACCTTGAACG       | GGTAATGTCTTGCATCATCAG   |
| 23          | At2g39730 | CDS          | CCTCCCGTGTTCGAGCAACCC     | CCGTTGGATCAAAGTTTTACGCC |
| 30          | At3g53270 | 5'UTR        | CCAACATCATCATCTTCTC       | CCACAAACTCGTCTATCAGC    |
| 36          | At4g12790 | 5'UTR        | GGTTTTGAGAGCAAAGAAAAACG   | GGTTAACACATGCATTGTTCCG  |
| 42          | At5g04430 | CDS          | CCTTCGAGGAGCAGATGCGGGC    | CCTCCAGAACCCTGGGTGC     |
| 43          | At5g09230 | 5'UTR        | CATCCGCCATTAACGACCTC      | CTCACAAACCGTCTGCATCC    |
| 44          | At5g13730 | CDS          | GGGTACCAAGGCAAAGTTTTG     | GCAATCTCTTACAGCTTGG     |
| 47          | At5g20250 | 5'UTR        | CCATTCAAATCTCACATTCCC     | CCCGTCGGAAATACGAACCGCC  |
| 48          | At5g35680 | 5'UTR        | CCTAATCACTTTCAACAACCTC    | CCGTCAATGCACATAACGTC    |
| 49          | At5g41150 | CDS          | CCATCCTGACATGGGTTTTGTC    | CCAGTTCCTTTCTCCGCCTGC   |
| 50          | At5g43910 | CDS          | GGTTGTGTGATGCTTGAGAG      | GGTTGTGTCTATGAGTCCG     |
| 51          | At5g45510 | CDS          | GGAGAAAGTTGTTGTAGGAG      | GGTGGAGGTACATCACTGTGG   |
| 57          | At5g63870 | 5'UTR        | GGTCCAAGATCCAAGCTTTGG     | GGGAAGGAGGTAGATTCCATG   |
| 58          | At5g65050 | CDS          | CAAAGATCATTGATCGTTAC      | CTTCACTTCCCCATCATTAGTTC |
| 59          | At5g66010 | CDS          | GGCGGCAGGTCATGTACGG       | GGGAAGACCCCTGAGGCGAACG  |
| 63          | At3g12110 | CDS          | GGCTCCTCTCAACCCCAAGG      | GGTAATCAGTAAGGTCACGG    |
| 64          | At5g60670 | CDS          | GTCACCGGAGGTGAGGTCCG      | GATGACTAGAGCCGCTGCGG    |
| 66          | At4g02560 | CDS          | CGCAAATTGATTCGCAGAGTC     | CCACCATCTGTACTTTCTCTGC  |
| 68          | At1g23970 | CDS          | CTTGACATGATCCCGATCC       | CCATCGCCCAATGCGCCACC    |
| 70          | At1g54360 | CDS          | CCTTCCATTCCACAGAATTC      | CCAGATTGAGTCAAAGCCCAC   |
| 72          | At2g04790 | CDS          | CCCTGAAAGCATAGAAGCAGC     | CCCATGACTTATTAACCTCC    |
| 73          | At2g21620 | CDS          | CCGGAACCTGAGAGAGAGAGC     | CCATGAGGGCTTGCTCGTC     |
| 75          | At2g36000 | CDS/3'UTR    | CTCGTTTAGTTTGAGAAATC      | CTTCATCAGCATTCAATAC     |
| 82          | At3g14230 | CDS          | CCTTTCGTCTTACCAGCAAC      | CCAAGCCATTCTCGGGAGCC    |
| 86          | At4g16845 | CDS          | GGATTGTTCTTGTCCATTTTG     | GCAAGCTCTGTTGCCTCGGG    |
| 87          | At4g35450 | 5'UTR        | CCACCACAACATTGTCTTTTC     | CCAGCGTTAGGAATAGATCTC   |
| 89          | At4g38510 | 5'UTR        | CCTCTACACAGATCTTTGGATTG   | CTTGACCACGTCCGGTAGTTCC  |
| 90          | At4g39260 | CDS          | GGTGCTTTGTCCGGCGCCTTG     | GGCTTTCTCGTCTTGAAGG     |
| 97          | At3g61860 | CDS          | GCGAATTAAGATAAAGATGAGG    | GGAAAATTGTGAGTTTGGC     |
| 102         | At1g27370 | 5'UTR        | CCTCCTTCTACTCTCGCTC       | CCCACGGGAACGAAGATACC    |
| 103         | At1g30500 | CDS          | CCAACCACCAATCCCTTCTGC     | CTTGCTCTTGATTGTCTGCGCC  |
| 105         | At1g33060 | CDS          | GGCTAATTTAAGTGCTCAGGGG    | GCTACATTTGCGATCACTTG    |
| 106         | At1g49950 | 5'UTR        | CCTTGATTTCGCATTAACCC      | CCAGGTCCATGCTTTATAACTCC |
| 107         | At1g59750 | CDS          | CCGTCTTACAACCTCAGCC       | CCCACCATGACCAAACGTAGC   |
| 108         | At1g30200 | 3'UTR        | GGAACCGTTTGGGACTGTG       | GCAGATTCATTGACGCAGG     |
| 109         | At1g77080 | CDS          | GATCTTGAAGAAAAAATTCAG     | CCTAGCTCTACTTACGGACAG   |
| 110         | At1g72050 | CDS/ 5'UTR   | GGTTGATGAGGAGTCTTCAAG     | GGACACTTAAAGAGCTTCCC    |
| 111         | At1g61660 | CDS          | GGACATGGTCTATGTCTCGTCC    | GCTTTAGAGTCTCCAAGCTG    |
| 112         | At1g09530 | 5'UTR        | CCGTCTTGTGCGTGCATTG       | CCTGTCTTGAGCAGATTCAAGC  |

|     |           |           |                         |                           |
|-----|-----------|-----------|-------------------------|---------------------------|
| 113 | At1g72650 | CDS       | GGTTTATTGCATTCTGATAATG  | GGTGGACTTGATCCTCCTC       |
| 116 | At1g18660 | 5'UTR     | GGATTCACCTTTAGTACTG     | GAGACTCTTTGAATGATTGG      |
| 117 | At2g22670 | CDS       | GAAACTGAAGATCATGAAGGG   | GAGACGAAATATCTTGAAGG      |
| 118 | At2g02960 | 5'UTR     | GGGGAGCTTTCACCAATTAG    | GCCTTATCATTAACCACCGG      |
| 120 | At2g41710 | CDS       | GGCTGCTGCTAGAGCTTACG    | GGTCCAGGCATACGACTGG       |
| 121 | At2g18300 | CDS       | GGATGCAATAAGGTCACAGG    | GGTCTAACGGAAACAATGG       |
| 122 | At2g36010 | CDS       | CCAAAGATGGAATGCTGGACC   | CTCAGGTCTCTTAATCTTTCC     |
| 124 | At2g37060 | 5'UTR     | CCCTCTCTGCCTCCTCTCTTCC  | CCCATTAGCAGGAAGACCTC      |
| 125 | At2g46790 | CDS/5'UTR | GGATTTGCCATCTATATCTGG   | GCTTTGAGCATGAGCAGTAGG     |
| 126 | At2g34830 | CDS       | CCGCTATGAACAGCCGGTCC    | CCATGGGTGGTTATGCTCAG      |
| 127 | At2g43010 | CDS       | CCGGTTATGGATCAGTCTGC    | CCGTCGGTGGTCTTCGTCGGC     |
| 128 | At2g15530 | 5'UTR     | CCCAGAAATTGAACTACC      | CCCTTGCATTGGATTCATACC     |
| 129 | At2g40830 | 5'UTR     | CTAGGGTTTCTCATTCCGATCC  | CCGTGAAGGCCGACAGCACGC     |
| 130 | At2g38185 | CDS       | GCTTGATTACTCAGAACCAGGG  | GAACCGCAGAACCCTGTGG       |
| 131 | At2g38880 | 3'UTR     | GGCAACATTAGGATTTGAGG    | GGAAACAATAACCAAACG        |
| 132 | At2g31370 | 3'UTR     | CCAACAGCAGCAGCAGCAAC    | CCAAAAGGTTTCTTCTACGTACC   |
| 133 | At2g32250 | CDS       | CCCATCGATTTCTTCCATCC    | CTTCGATGTCATAGCAGCC       |
| 134 | At3g08505 | 3'UTR     | CTATCAGAGTTCCTTGGTGGCC  | CATTGAGTTTCTCCTGTGTCC     |
| 135 | At3g54480 | CDS       | GGAGTTACATGAGATCTCAAAG  | GATAAATCCTTGACAAAACGG     |
| 136 | At3g07740 | CDS/5'UTR | GGGAAGAAGTGCAGCTTGG     | GGTGGAAATTGATGCCGCAG      |
| 137 | At3g14740 | CDS       | CCGGAAGTTTACTTTGAGGATCC | CAACAATCTTGACTTTCC        |
| 138 | At3g10490 | CDS/3'UTR | GGAATGGGCTGATGATGAAGG   | GGTCCGATTCGATATCCAGTGG    |
| 139 | At3g04030 | CDS       | GCACTGCAAATGCAAATAGAGG  | GGCAGCTTCGATCCCAGCTG      |
| 140 | At3g15030 | 3'UTR     | GAAGAGGAGCAGCAGCAGCGG   | GGCCATTGACTACACAAACCG     |
| 141 | At3g51880 | CDS       | GGGAGTGATGAATCTGAAAAG   | GGATCTGCAGTTAAGCTTGAG     |
| 142 | At3g12250 | 5'UTR     | GGACAACCTTTTACTCAGACAGG | GGTATCAGCCATACTAGTTTCTG   |
| 143 | At3g12250 | CDS/5'UTR | CCCTCTAGTGTGAACTCTGC    | CCTTTGATCGATCACTGGAATC    |
| 144 | At3g23280 | CDS       | GCACAGTGATGCCTTTGTGG    | GGCTGTCACCTCAGTCAAGG      |
| 145 | At3g17609 | CDS       | CCAACGACCCAATGGGAATC    | CGTTTAGCTGTAGAGACTCC      |
| 146 | At3g24120 | CDS       | CCAAGTCACCGAAGCTCTAC    | CCAGCAAAAGTAGCAGCTTGC     |
| 148 | At1g76510 | 5'UTR     | CCGTTTCTCGTCTTTTTTCTC   | CCTCTACAACACCTTTGGTACC    |
| 149 | At2g27230 | 5'UTR     | GGCATGTCCGAGTATGATCG    | GACCTTAAAGCTTCTCTTAG      |
| 151 | At3g47550 | CDS       | CCTTCTTCGTGCTGCTGTTTTTC | CCTTAACGGAGAATCATTGCC     |
| 152 | At3g58030 | 5'UTR     | CCATCTCTATTGTAATTAGC    | CCCAAGATTCAAATCCAGGTTT    |
| 153 | At3g59060 | CDS       | CCATCCCGGTTTAGTATGTC    | CCTATTTACCCATATGAAGACTGTC |
| 154 | At4g01060 | CDS       | GGTGCCGTTTGACATGGATAACC | GTCACCGACAAGCTTATGCATTC   |
| 155 | At4g27050 | 5'UTR     | GGTTCTTCTTTGTGAACAAC    | GGGAAACTCCTTAGACAGCAG     |
| 156 | At4g34430 | CDS       | GGGCTTCCATAAATCTCTTACAG | GGAGACCTCTTCTGCTTTTTTG    |
| 157 | At4g38900 | CDS       | GGGAACCGGGTCTGCTTTTAG   | GGTAGCCTCGGTCTGAAGAGTCTG  |
| 158 | At4g32730 | 5'UTR     | CTCAGCGTCTTAATTAATTCAG  | CCTTGGAGACTCTCTAGTGGAG    |
| 159 | At4g37180 | CDS       | CGAGGATCAAAGACAATCATTCC | GGTTTTGCCCTTCAACATC       |
| 160 | At4g14410 | CDS/5'UTR | CCTTCTCTCGACGATGATTTCG  | CCAATACTAAAGACTTCATCTGG   |
| 161 | At4g28790 | CDS       | CCATGCTGGATGATGTTATAG   | CCTAGGGAAAGGTATGAATGC     |
| 163 | At4g13100 | CDS       | CCTCCTCACTAACTCGGAGAC   | CCTCTCCTCCCCCTCGCAGC      |
| 165 | At4g16420 | CDS       | GCAGAACATGAAAGAAGAGTAC  | GCTCAGCATCATTGTCATATTC    |
| 166 | At4g25990 | CDS       | GTTCCGAGAAAGTGGTATGAGAG | CGTAGACCACTTAAATTCCTTG    |
| 167 | At4g18020 | CDS       | CCGATCATTGCATCACTACTAC  | CCTTATGAACAACATGCTGC      |
| 168 | At5g18240 | CDS       | CCCATAAGTGATGCCCTCAAATG | CCCAGCTGCACCTAGTTCTG      |
| 169 | At5g24520 | CDS/3'UTR | GGTCTTCTTCGAGCCTGATTG   | GGAGCGCAAACCAAACCTAC      |
| 170 | At5g28770 | CDS       | GGTGTTCGGTCTCCTCTCC     | GGAAGAAGCAAGAGAGGCTTG     |
| 171 | At5g18620 | CDS       | CCATCAAACGACCTTCGGG     | CCTTGTCTCTAAGGAGCTTC      |
| 172 | At5g60580 | CDS       | GGTACAGGTGCCATCGCTATATC | GGGCGAAGAGAACGACCAACGC    |

|     |                  |            |                                 |                              |
|-----|------------------|------------|---------------------------------|------------------------------|
| 174 | <b>At5g13220</b> | CDS/3'UTR  | CCCATCGCAAGGAGAAAGTC            | CCAAATCCAAAAACGAACATGG       |
| 176 | <b>At5g06960</b> | 5'UTR/CDS  | CCACGTCTTTGCAGTTGTAG            | CCATCTGTTGAGACTGATGTTC       |
| 177 | <b>At5g59780</b> | CDS        | GGACCGTGGACAGAACAGGAGG          | GGCGTGAAGCTCAAGGACTAAAC      |
| 178 | <b>At5g67580</b> | 5'UTR      | GCGAATCACATTTGATCTATG           | GCTTAAGAACTCCAGCTTTAAG       |
| 179 | <b>At5g48150</b> | 5'UTR      | CCTTGTCTCCGACAACTTTC            | CCTAAGCTTCTCAACAGAGTTAG      |
| 181 | <b>At5g05550</b> | CDS/3'UTR  | GGAGAAGCAGAGAATGGAAG            | GGATCCTCCAATTTCAATGAG        |
| 182 | <b>At5g16820</b> | 3'UTR      | GGAGAATAATGACTTGGTATTGG         | GGTAAATCTTTTATGTTTCTTC       |
| 183 | <b>At5g22000</b> | 3'UTR      | CCTGAAACAAACAATGAGCAC           | CCTTCTTCTATGCTCCACAC         |
| 184 | <b>At5g23090</b> | 5'UTR      | GGAGAGAGAAAATCCCTCCG            | GGAAGAGAAGCGTCTTCCTTGG       |
| 185 | <b>At5g23090</b> | CDS        | GGATCCAATGGATATAGTCG            | GGAGCAATCGTCCGTTTATCC        |
| 186 | <b>At5g12840</b> | CDS        | GGATTGATGGGAGCATATGG            | GGCACGTGCTTTTCTTCGCC         |
| 187 | <b>At5g02470</b> | 5'UTR      | CAGTTTGTGTTGTTTGTATAG           | CCAATTTCAGAATCATCATC         |
| 188 | <b>At5g02840</b> | CDS        | GCTGTTGATGAGAAACCTCAC           | GCTGGTAGAGAGTTGTTGCG         |
| 189 | <b>At5g43270</b> | 5'UTR      | CCTCTGGGATCCATAAGTTTTG          | CCATCAATTTCCCACTCCATTG       |
| 190 | <b>At5g56370</b> | 5'UTR      | GGGCAAAATGTCAAATTAGG            | GGAAGCAATGACAGTATGCGC        |
| 191 | <b>At5g18830</b> | CDS        | GGAGCCAGACAGTCTTGTTTCC          | GGATCAGTCTCTTTTCCGCC         |
| 192 | <b>At2g46370</b> | 5'UTR      | CCTTTTTTCTCTCTCTCTATCC          | CCACAGTTTTGTAAGTAAATGGC      |
| 193 | <b>At1g07350</b> | CDS/3'UTR  | CCTGTCTGACCCATGGAC              | CTCGAGCAGTTCTCAGCCCC         |
| 194 | <b>At3g49430</b> | 5'UTR      | CCTCCGAGTATTGTTGGCTCAGACC       | CCTAATGTCACCGGGCAAGTTACC     |
| 195 | <b>At3g01150</b> | CDS        | GGCCAAAGAAGCACTGGAAGG           | GGGTTCTGCCAACCTGCTGGTGG      |
| 196 | <b>At3g01150</b> | CDS        | CCATGAGATTGTTAAACAATCAGAGTCC    | CCAGCAGCTTTCTCAAATGTGGC      |
| 198 | <b>At4g36690</b> | CDS        | GGATGAGCTTAGAGATGATGAGG         | GGCCTGCCACTGGCTGACCATTGG     |
| 199 | <b>At1g79880</b> | CDS        | GGGAGATGGAGAGAGATTGTGG          | GGCTCCTTTCCGGCCTTCTTGG       |
| 200 | <b>At1g79880</b> | CDS,/5'UTR | GGCCTCCTCCTTCAACGAAG            | GGCCATCTTTGCTCTTGGTG         |
| 202 | <b>At3g13570</b> | CDS        | GGAGGCCATTTGAGCAGTTTGG          | GGTTTTCTTCAGCAAATACGACAG     |
| 203 | <b>At1g11650</b> | CDS/3'UTR  | CCAGAGCTCTGCTGCAGGGGTAAC        | CGCAAACAACAAGCAGAGTGAC       |
| 204 | <b>At3g53500</b> | CDS/5'UTR  | GGAAACTCGCCTCTATGTTGG           | GCGTCATCAGCATCACGAGG         |
| 205 | <b>At3g61860</b> | CDS        | GGCAATTTGAGTATGAAACTCGCCAGTCGG  | GGAAAATTGTCGAGTTTGCGAATAG    |
| 206 | <b>At2g21660</b> | CDS        | GGCGTCCGGTGATGTTGAGTATCGG       | GGCTTTCTCATCCTTGAAGG         |
| 207 | <b>At2g47580</b> | CDS        | GGCGTTAAGACCTTAAGCACAAGG        | GGTTTTGGACAAAGAGAATATTATTTGG |
| 208 | <b>At1g09230</b> | CDS        | CCGTCGGTTGACTGTATATCAAAAAC<br>C | CTGCATTAGCCTCACACCAAGAC      |
| 209 | <b>At2g16940</b> | CDS        | GGAGTCAGGAAAGAGAAAAGCTTGG       | GTTCTCTGATCTCTTTCAGG         |
| 210 | <b>At4g02430</b> | CDS        | CACATGCGTAAAGGAGGAGAAG          | CCGAACATATTCATGAGAAAAC       |
| 212 | <b>At4g02430</b> | CDS/3'UTR  | CCTGCAAAATCTACATCGAGATCTCC      | CTGTCCCTAGCTCGATGGGTCC       |
| 213 | <b>At5g53180</b> | CDS        | GGATGTTGTGGGGAATGTTCTTCTGG      | GGTATCCGGCTGTCTTCTCGAAAG     |
| 214 | <b>At1g31600</b> | CDS        | CTCGCTTCGACCTCTCTTTC            | CTAACACAGAGACTTTGTTCC        |
| 215 | <b>At1g31600</b> | 5'UTR      | GACCATGCTCTGACCTTAAAGG          | GGTAAACAAGAAAAGCCCTGG        |
| 216 | <b>At2g42890</b> | CDS        | GTACACTTACAAGATGCTGGTGG         | GGAAGGGAACGATGTGCAATGG       |
| 217 | <b>At1g16610</b> | CDS        | CCTAAACCTGTCTCAGCTGCACC         | CCTTCTAGGTGATAAGCCTCTCC      |
| 218 | <b>At2g30260</b> | CDS        | CCACCGAATCAATCAATCTACATCC       | CAGTGACTTCACTAAAAGTAACCC     |
| 219 | <b>At4g25500</b> | CDS/5'UTR  | GGTGACCTGGAACGACTATTCAGG        | GCGGTCAAGTGCTCGGATGG         |
| 220 | <b>At3g55460</b> | CDS        | CCCTTTGAGAGGTTTGGACC            | CCTGTTTCATGCTTCTTTGAGCC      |
| 222 | <b>At5g06160</b> | CDS        | GGAGCCACCGTCCAGCAAGG            | GTCGCAGTCTGGCCACCAAGCGCTG    |
| 223 | <b>At2g29210</b> | CDS        | GCAAATGAAATAATGAAGAAGAGGG       | GTCAGCCCTTCTCCATCCTCTGG      |
| 224 | <b>At1g15200</b> | CDS        | CAAAGAAATTGGAATTGCTTTTCC        | CCTCACTGTATCTTCTTCC          |
| 225 | <b>At3g53570</b> | 5'UTR      | CCGGCGATCAAATTACGACAGCGAC       | CCGATGAGGGAATTAACATTCC       |
| 226 | <b>At4g24740</b> | CDS        | GGTGTGAAGAAATACCGTGAGG          | GGAGACTAACAGAATATTTTCTGG     |
| 227 | <b>At4g24740</b> | CDS, 5'UTR | CCTCATACTCACATGGATCGTCGTCC      | CCATTTCTTCTCTCCCTATCCC       |
| 228 | <b>At4g32660</b> | CDS, 3'UTR | GGGGTGCTGAGAAAATTTTCCAGG        | GCTGTGAGACGCTCAGATGG         |
| 229 | <b>At4g35785</b> | 3'UTR      | GGTGCATTAATATCTCAACCAG          | GGAGCTTTTCAAGCCAAGATAGTGG    |
| 232 | <b>At1g48960</b> | CDS        | CCACGGCGGCGCTCTCCTCCGCC         | CCAACGAGAAGCATCGAAGCACC      |

|     |           |           |                             |                            |
|-----|-----------|-----------|-----------------------------|----------------------------|
| 233 | At5g54430 | CDS       | GGTGGAGATGATGATGGAGATG      | GGTGATATATTACTTAGATCCCACG  |
| 234 | At1g55870 | CDS       | CTACATCAATGGATTTTCTTGCC     | CCAACTTAACTCTTCAGTTTCACC   |
| 235 | At1g69080 | CDS       | GGAGAAGACGAATCTTGTG         | GGCATGTTGTTTCTTCTGG        |
| 236 | At1g04950 | 5'UTR     | GGATCTTCGTCGCTCAACG         | GGAGCAAGCATAAGAGCAGCTTCAGG |
| 237 | At1g07830 | 5'UTR     | CCATTCTCTGTGGCCGTCACCGTCGCC | CCGAATCGTCGAGGCAGCTGCTGC   |
| 239 | At1g31500 | CDS/5'UTR | CTACAACCTCTGCATCATCTTCC     | CCTTCAACAGATTCAAATTTGC     |
| 241 | At1g02090 | CDS       | CAAAAAACATCGTAAGGAAGC       | CCCATCTTCTTCGTAGTCC        |
| 242 | At1g60850 | 5'UTR     | CTAAATTGCTCAATTCTCTCGGCC    | CCGGCAGGGACGTCAGGGAGATC    |
| 243 | At2g33830 | CDS       | CCGACCTAAACCGGAGCATGGCC     | CCGATCCTGGCGTCGTCGGAGTTCC  |
| 244 | At5g09230 | CDS       | CATACAGTTCTGGTTCAAACC       | CCTGGTTGTGCTGCAGTGAACC     |
| 245 | At5g46110 | CDS/5'UTR | GGCGATCAACGGAGGAGAGAAAAG    | GAAGAATCCAGTGACTAGCCATGG   |
| 246 | At5g59440 | CDS/5'UTR | GAAACGGATCTGCTCGGTTTCAAG    | GGTTCTGACACCAGAAGAAAAG     |
| 249 | At1g72560 | 3'UTR     | GGCTTCAACAAAACGGGAGTCACG    | GGATGGTAAAAGCGAACCTTG      |
| 251 | At1g37150 | CDS       | GGACAAAGAGTGATTGCTGAAG      | CCATCAGGATGAAGCTCATAC      |
| 254 | At5g50240 | CDS       | CCGCTACAATTCATCATCATC       | CCTCTATCTAAAGCCTCCATAAC    |
| 256 | At1g54080 | CDS       | CCAGAGGTTACTGATGCAGC        | CCATCAGAGCTATGTTTTGCC      |
| 259 | At3g17090 | CDS       | GGGACTTTTGTGGTGTTTACG       | GGTATTTCTTGCCACAGCTCTG     |
| 260 | At3g26740 | CDS       | CCAACTATTCTTCTCTCTTCC       | CCACTGATTACTTCGCATGC       |
| 261 | At4g10100 | 5'UTR     | CTCATGTGTGTGGTATTACCC       | CAGTGTTAGATCAGGCACACC      |
| 262 | At5g20040 | CDS       | CCGGAGTCTCTAAGAATGAGC       | CCACGCATGAAGCTTCACTC       |
| 264 | At5g65430 | CDS       | CCGATCAGGCTTGGTTTGGC        | CCGTCTTTTCTTCCATTAGACC     |
| 267 | At2g42245 | CDS       | CAGGGTACATATGGGACTCC        | CCCTAATTAATCTTCTTACGC      |
| 268 | At1g03457 | CDS       | CCGTTGCAAGTTAAGTATGC        | CCCTCTTAGAATCTGTAGATCC     |
| 270 | At1g53650 | CDS       | CCATGTTCAAGAACTCAATCC       | CCTTAGAAGCTCTTCCAGGTAACC   |
| 272 | At3g23900 | 3'UTR     | GGATTATTCTTAAGTCATAGG       | GGAGTGAAGGTGGTTCTTGG       |
| 273 | At3g07810 | CDS       | GCTAGAAGTTCATCTCCAGG        | GGAAAAGAAGATAATCTAAAAG     |
| 274 | At5g19030 | CDS       | GGTTTTCGGATTCAGTGAGTGAAGG   | GGCTTCGACAGCCGACTGTG       |
| 275 | At5g19030 | CDS       | GGACTCGGCAGTCACTAGGATACGG   | GGAAATCGGAATGTGGTCTCCGG    |
| 277 | At3g23830 | 5'UTR     | CCTCTTTTCTCACTCACTGTTAC     | CCATTTGAGCTCTGAGAAACCCC    |
| 278 | At2g02570 | CDS       | GGCAGCTTTTGTGAGGATCCTAGG    | GGAGTTGCTTCAGCACTAECTCCGG  |
| 279 | At3g25840 | 5'UTR/CDS | GGAGAGATTTTAGAAGAAGATGGG    | GTTAGACTGCCTGCTGTTTGACGG   |
| 280 | At5g11200 | CDS       | GGTACGTGGGAATACACAGTTCTGG   | GGAGATGGTTCAATCTGTTGTAG    |
| 281 | At5g47210 | CDS       | CCAAAGTGTGTTGAGTCCATGCAAC   | CCACCTCTCCCGTTGTACCTC      |
| 282 | At5g63120 | CDS/3'UTR | GGTGACAAGACCCAATCGG         | GGTTCGACCAATCCTATGG        |
| 283 | At3g01540 | CDS       | CCAAGTACCACCACCTAATGTCC     | CCTACCTGCATAGCAATGGGCC     |
| 284 | At4g33060 | CDS       | GGAGAAGAAGCTGAAGAAGAGG      | GAAAAGCTTTTATCTTTTTGAG     |
| 285 | At3g19840 | CDS       | CCATATTCTGGTTCTCATCC        | CCAGGCATCTAACCGATTTCC      |
| 286 | At1g67210 | CDS       | GAACTCGATCCTCCTCCATGG       | GAGGGCTAGCTTTTTCCAAG       |
| 288 | At3g12570 | 5'UTR     | CCATGTGTTGTAAGTGTGCC        | CCATGGATAGCAGTGTGAC        |
| 289 | At3g12570 | 5'UTR     | GGGATCATTTTGTAGGAGCG        | GGTGATAGTTCTCCATAGACAGG    |
| 291 | At2g46270 | CDS       | CTCATTTTCATTCTGTTTCTCC      | CCTTAATCTTGACCTTCTAGC      |
| 292 | At4g36730 | CDS       | GATGAAAGTGTACAGCGGG         | GGCTTCATGGGACCGAACCTTGG    |
| 293 | At2g20180 | CDS/5'UTR | CCGATGATGATTATGTCAACAACC    | CCATAGAAGGAAGAAGCTTC       |
| 295 | At2g02390 | CDS       | GGCTTGATTATGAGTATATACCAG    | GGTAACAAAGGTGGCTCAGGG      |
| 296 | At1g67980 | CDS       | CACAAGATTAATTTTATCCATTCC    | CCTTCACCAATTTTAGAAGCC      |
| 297 | At3g44300 | CDS       | GGTGGATGTTTCGATTGTCCGG      | GGTCAAGTGTAACATCTGG        |
| 298 | At5g09880 | CDS       | GGGATGTGCGATTGATCATGG       | GGGCTTAACCATCACAGG         |
| 299 | At5g11330 | CDS       | CCTCAGGCTCGGCAGATCATC       | CCGAATCGAAGACAAACCCC       |
| 300 | At5g59300 | CDS       | CCGAAAATTCACAAAATCAGAACC    | CAGGAGGTCCGATAATGGTAAC     |
| 301 | At5g09790 | CDS       | CCCATTGTTGTCGTGTCCCC        | CCGTTAATGCAGAAGCAAGTGTCC   |
| 302 | At5g09790 | CDS       | CATCCTCCTGGTGTATCATCC       | CCTCAACGTTTGTGGAGATTC      |
| 303 | At3g46460 | CDS       | GGACTCAGTGAGAGAAGAAG        | GAGGAACGCAACATTCTCCGG      |

|     |           |           |                          |                          |
|-----|-----------|-----------|--------------------------|--------------------------|
| 304 | At5g18800 | 5'UTR     | CCGATCATCAATGGCCGCCGTGCC | CCACTGAGAATGATTTCCAAC    |
| 305 | At1g01060 | 5'UTR     | CCCGGTGAGATGATAAGTC      | CCATCTTTGATCTCCCCAAAC    |
| 306 | At2g46830 | CDS/5'UTR | GGACTGAGGAAGAACATAATAG   | GGTTTACGCTTAGGCCGTGG     |
| 307 | At3g11540 | CDS       | GAGAAGGCTGCACCTTGAGAGG   | GAATCTGGATCTATCTTAAGG    |
| 308 | At5g10140 | CDS/3'UTR | GGAGGAACACCTTGAGACTG     | GAGTCACCGGAAGATTGTCCG    |
| 309 | At5g65060 | CDS       | CAAGGAGTTACTAGAAAATAGTCC | CCCGTGACATTCTCTGTACC     |
| 310 | At5g65070 | CDS       | CCGTCGCTCTTATCATCATCTC   | CCGGTGACATTGCTCTTGCATCC  |
| 311 | At5g65080 | CDS       | GTCAACTCTCAATTCTCTGTGG   | GTGGCCAGAGCTATTTCCGG     |
| 312 | At5g13790 | CDS       | GGGTTACTTAAGAAAGCTCG     | GTAGGATGGAACATAGTGGG     |
| 313 | At5g37055 | CDS       | GGAAGAGATGTGAACCGTCCG    | GCTGCTTCAAGTAAGTCGG      |
| 314 | At2g43410 | CDS       | GGGCTGGCTCTTACGATAACAG   | GATGGCCTCCTCCAGTTTGG     |
| 315 | At4g31120 | CDS       | CTCAACGAAAGTCAACAACC     | CCAACCCAGTACGAACGGCC     |
| 316 | At2g28550 | CDS       | CGAAATTGGTAACTCCGGTTCC   | CCAAGAGTAAAGTTGATATC     |
| 317 | At2g28550 | CDS       | CTTGGGAATCTCTTATCGACC    | CCCCAGTTACTCATCATCCC     |
| 318 | At5g48560 | CDS       | GGACGCTCTTGTGTCAAAGG     | GTTGAGATTCAATTGTGGGG     |
| 319 | At5g65640 | CDS       | CCTCTGGTCAGAAACTCACC     | CATTGTTCAATCTCCAAGCC     |
| 320 | At5g24590 | CDS       | CCCTGAGGTTACAACCACC      | CCACATCCTTTCGTCATAGTTTCC |
| 321 | At4g27410 | CDS       | CGATCTCTACAAGTTCGATCC    | CTTGTAATTCGACACAACACCC   |
| 322 | At2g33480 | CDS       | CCGATGTTTGTAAATCCGATCC   | CTGTCTCTTCTCATTCTCC      |
| 323 | At1g76580 | CDS       | GGGTAACACGCGTCAATGG      | GATTCAACTCTTTCGAAATCGTGG |
| 324 | At5g43270 | 5'UTR     | GGGATCCATAAGTTTTGAG      | GCTTGAAGAATACAGAGAGG     |
| 325 | At2g47890 | CDS       | CCACGGATGTTCTCTCTGACC    | CGAACCTTGCCTGATTCATACC   |
| 326 | At1g69250 | CDS       | GGTCTATCAAAGAAAACGGG     | GGTCTGCAAGCATGAAGGGCG    |
| 327 | At5g59950 | CDS       | CTGCTCCATACCAATCAGCC     | CCACTTCTATCAAAATGAAC     |
| 328 | At5g52310 | CDS       | GGTCAATGAGAAGGATCAAG     | GATTGTGGTGACTCTTCAACGG   |
| 329 | At4g17615 | CDS       | GCAGTTCGGTTGTTGATGATGG   | GGGGTGGAAAACATTGAGTG     |
| 330 | At3g10300 | CDS       | CTCCTTATGTATCTATTACC     | CCGCTTCTGTCTTATCAAACC    |
| 331 | At3g10300 | CDS/5'UTR | CTTCACTTTTCTTTAGTCTTC    | GGTAAAACAGTGAGCATGAAG    |
| 332 | At3g16800 | 5'UTR     | GAATATTCATATCAGAGAAG     | GGCTATCATATGTCCTCCATGG   |
| 333 | At3g16800 | CDS       | CCCGGTTCCAGCTCTCGGTAGAC  | CCTCTTACTATCTCCACTGCC    |
| 334 | At1g01140 | CDS       | CCATCATTGCATGTGGTAGAGC   | CAGTATTCCAGACTACATCC     |
| 335 | At5g66210 | CDS/3'UTR | CAAAGACGGGTACATAACGCC    | CCTCTTGATCTAGTGCACC      |
| 336 | At5g28080 | 5'UTR/CDS | GTTGAAGTTGATCCTACTGG     | GAGCCTCTCTAGCTCTTGAGG    |
| 337 | At5g28080 | CDS       | GTCAAGATTGGAGATCTTGG     | GAGTCTAAGGGACTGTGG       |
| 338 | At5g57630 | CDS       | CAGATGCTAGAAAACTTTTCC    | CCATACATCTACTGCTGTCC     |
| 339 | At4g13020 | CDS       | GTAGATACTTGTCTTCAAGG     | GGATGATTTAGCTTACGAAG     |
| 340 | At5g63990 | CDS       | CGAGTTTCTTCGAGTCATACC    | CTGCGTCGTAAACGACGATTCC   |
| 341 | At2g15970 | CDS       | CACTATCGCTGCTAAGAACC     | CTACGAAAGCAATCCATTACC    |
| 342 | At3g01090 | 5'UTR/CDS | CCGAATTTTCTCTCCGCC       | CCAATACCAAGAGTTCTCCC     |
| 343 | At3g29160 | 5'UTR     | CCTGACTCAGCTCTGCGTCACC   | CCCAATTCCAAGAGTTTTACC    |
| 344 | At3g29160 | CDS       | CCTGTTATTGGATAACCGGTTCC  | CCAAGAGCCCATTTTCGATCAAC  |
| 345 | At1g49730 | CDS       | CTAAGCTGCATCACCGTAACC    | CTTGATTTAATATCTCTATGAC   |
| 346 | At4g23260 | CDS       | GGGAAGTGTATCCCTTCTCTGG   | GGAAAAGTTGCTTGTGCGCCG    |
| 347 | At4g34460 | CDS       | CCAACCTCCAGGTCTATCAGCC   | CCTGTACACAAGGCACTTCC     |
| 348 | At4g34460 | CDS       | CGCCTCCAGCTCCTCGATACC    | CTTGAGATGCACTGACAATCC    |
| 349 | At5g40280 | CDS       | CTTTAGGAGGTGACAAAAGCCC   | CCCTGGGTGAGTTCATCATCC    |
| 350 | At1g77740 | CDS       | CAGCGGTGAGGCTAAGAAACC    | CAGGATCCACCGTGAATAGCTCCC |
| 351 | At2g18960 | CDS       | CACTAGCAGAGCTATCTTCC     | CGCTGAGAAGTCAAATTCCC     |
| 352 | At5g57110 | 5'UTR     | CTTACCGGAATTTTCTCTCC     | CCCAGACTCCACATCGCCTCC    |
| 353 | At1g27770 | CDS       | CGAAGCACTTCGAACTTTTGGC   | CTCACCAAAGTATGCTTATCC    |
| 354 | At5g23450 | 5'UTR     | CTTTTGCTGATACACTTCTCTCC  | CGTCTAAGCGACTGTTGTGCC    |
| 355 | At3g16785 | CDS       | CTCTCTTGTGGTCCGAACACC    | CCCAAATCGATCGTTGTGTGCC   |



|     |                  |             |                          |                         |
|-----|------------------|-------------|--------------------------|-------------------------|
| 356 | <b>At3g56860</b> | 3'UTR       | CACTAAATGTATCATGTATCC    | CGTTGAGAAGCTTGCACCAC    |
| 357 | <b>At1g54100</b> | 5'UTR       | CATTTCCTCGATACGATCAACC   | CCATATTTTAGCTGCTTCCTC   |
| 358 | <b>At1g09000</b> | CDS         | CCGTTACAGATAAATAACACC    | CCATTACCAGGACTTTCGTC    |
| 359 | <b>At2g38170</b> | CDS         | GGAAATGCAGCTGAACATGCTGG  | GGACCAGTCCCTTCATGTAG    |
| 360 | <b>At3g06510</b> | CDS         | CTCTACCAATGGGTGTATTCC    | CCCGATTCACTGTATTTCATC   |
| 361 | <b>At4g13850</b> | CDS         | CCTTAAGGGATGCTTTTGCTC    | CCTCCTCTGTTTAGAAACCACC  |
| 362 | <b>At4g26070</b> | CDS         | CCTTCAAACCTTGCTAATCAATC  | CCTGCGTCGGTGAAGTAAGCC   |
| 363 | <b>At5g24270</b> | CDS         | GAGTTTGGTGAATTTGTCCGG    | GGCAAAGTCATGTTCTTGATG   |
| 364 | <b>At5g67030</b> | CDS         | CCATCGATGCTTGACTGGGTCC   | CCGAAACGCAACAATCGTCGCC  |
| 365 | <b>At4g34000</b> | CDS         | GGTGCAGTTCTGGAGAAAGTG    | GCATCCCATTCCCATGGCTGG   |
| 366 | <b>At5g25610</b> | CDS         | CCTCTGATCTGTCTTCTGGTTC   | CCAACGTTACGGCGGTTCC     |
| 367 | <b>At1g71860</b> | CDS / 3'UTR | CCACCTAGTCTCGGCCCAATC    | CCCTCTAAGCAGACGAACC     |
| 368 | <b>At1g78290</b> | 5'UTR       | CTTCCCAAGAAGATCAAATCC    | CCTATGGTTCATGATTTCTC    |
| 369 | <b>At4g31720</b> | 5'UTR       | CGTCTCAGCTCAATTCTCTTCC   | CTCTTAGCCAAGTAGTGCTCC   |
| 370 | <b>At5g35410</b> | CDS         | CAGCAGAGTTTTCTGTCCACC    | CCAAGGATCTTCTTGATTCC    |
| 371 | <b>At5g37370</b> | CDS         | GGACGGATGACGACAATGGG     | GGGCAGTGTCTCTGAGCCACGGG |
| 372 | <b>At1g76460</b> | CDS         | GGTCGATCCAAAGGATATGG     | GGAAGTGGTTGCTGATACGG    |
| 373 | <b>At3g13224</b> | CDS         | GTTGGTGGTATACCCTCAACGG   | GGGTGACTACCCTAAGAAGG    |
| 374 | <b>At4g36960</b> | 5'UTR       | GTTTAGGGCATCCTTGTTGGG    | GTAATCCTTAAGCCCATCGG    |
| 375 | <b>At3g20270</b> | 5'UTR       | CTCAGGGATTACTTACTACC     | CTCCGCGGAATAAATTAGCCC   |
| 376 | <b>At1g64625</b> | CDS         | GGGAGAAGTAGCTTCATCCGG    | GAGTAGATCCTAGCTGAACAACG |
| 377 | <b>At3g51530</b> | CDS         | CCGTCGTCGATGTCTCTCTC     | CCCATACTCCAACATAAACACC  |
| 378 | <b>At3g62190</b> | CDS         | CCTGATGATCAGAAGCTTGTGGC  | CCGAGGAACCCCAGTCTTGAC   |
| 379 | <b>At5g04275</b> | pri- miRNA  | GTTTGTGTGTGTGAGACTTTGG   | AGATGAGCTTTCTTCCATGG    |
| 380 | <b>At5g08185</b> | pri -miRNA  | GTCCATTTGGTTTCATAAGG     | GCTTTCCAGAAAAGTAATCGG   |
| 381 | <b>At5g53450</b> | 5'UTR/CDS   | GGGAAAGAATCAAACTTTTG     | GGTTTCGTTTATAACCAATG    |
| 382 | <b>At1g44910</b> | CDS         | GCAAATTC AAGATAGACTGG    | GGCTGTAAGGATGCCTGCAG    |
| 383 | <b>At2g43640</b> | 5'UTR       | CCTTTTTACCGAAGAGACTCC    | CCCTTCTCTTTGCTTTTCTC    |
| 384 | <b>At4g02200</b> | CDS         | GTGTCACCATATCGATGAGG     | GACATCTCTATGCTGAGTGG    |
| 385 | <b>At2g43810</b> | 5'UTR       | GGCTGCTTCATCGAGCGGAAG    | GTTGAGCTTGACAACAACCTGG  |
| 386 | <b>At4g01250</b> | CDS         | CCGGTAGCGTCACTAGCAAACCC  | CTTGTTTACGGGCTAAACAACC  |
| 393 | <b>At2g26150</b> | CDS         | GGAAATGGAGGAAGAAACGG     | GCCTCAACCTAACTACCTCAG   |
| 411 | <b>At3g26744</b> | 5'UTR       | GGAGAAATAGTGACGGTGAG     | GATCTTGTGGATGTGGTTGG    |
| 412 | <b>At4g29810</b> | CDS         | GGATTGAGCAATAATCTCAAG    | GCTCAGCTGATCATCAGCTGG   |
| 413 | <b>At2g33120</b> | CDS         | CCTTCTTCTAACAACAAGTTTACC | CCATATCTCTTGTGAAATCC    |

## Supplemental Table 2

### Gene transcripts significantly up-regulated in either *upf1-5*, *upf3-1* mutants and/or CHX treatment

#### Peaks that change significantly in both *upf* mutants and CHX treatment

| Primer pair | Band Size (bp) | Gene Identifier  | Gene name/function                                                                                                                                                                                                                                                                                                               | Wt mean | SE   | <i>upf1-5</i> mean | SE   | <i>p</i> <=0.1 | <i>upf3-1</i> mean | SE   | <i>p</i> <=0.1 | CHX mean | SE   | <i>p</i> <=0.1 | Exon No. | Transcript features                                                           | AS event                                                                               | PTC to pA | Auth stop to pA |
|-------------|----------------|------------------|----------------------------------------------------------------------------------------------------------------------------------------------------------------------------------------------------------------------------------------------------------------------------------------------------------------------------------|---------|------|--------------------|------|----------------|--------------------|------|----------------|----------|------|----------------|----------|-------------------------------------------------------------------------------|----------------------------------------------------------------------------------------|-----------|-----------------|
| 21          | 341            | <b>A12g37340</b> | RSZ233, RSZ33 (ARGININE/SERINE-RICH ZINC KNUCKLE-CONTAINING PROTEIN 33) - pre-mRNA splicing factor/ SR protein/ nucleic acid binding / nucleotide binding / zinc ion binding                                                                                                                                                     | 0.04    | 0.00 | 0.07               | 0.01 | 0.064          | 0.13               | 0.04 | 0.000          | 0.20     | 0.03 | 0.000          | 7        | PTC+; ds splice junctions                                                     | Alt 3' in IVS2 adds 218 nt                                                             | 1070      | 225             |
| 30          | 277            | <b>A13g53270</b> | Unknown protein - similar to unnamed protein product [Vitis vinifera] (GB:CAO65717.1); contains domain PTHR15131 (PTHR15131)                                                                                                                                                                                                     | 0.10    | 0.01 | 0.14               | 0.01 | 0.012          | 0.16               | 0.01 | 0.001          | 0.15     | 0.01 | 0.004          | 9        | No reason for NMD from AS event - uORFs                                       | Alt 3' ss and alt 5' ss in IVS1 (5'UTR) - uORFs of 43 aas but in non-NMD isoforms also |           |                 |
| 44          | 288            | <b>A15g13730</b> | SlG4 (SIGMA FACTOR 4); DNA binding/ DNA-directed RNA polymerase/ transcription factor/ regulation of plastid-encoded RNA polymerase PEP                                                                                                                                                                                          | 0.22    | 0.02 | 0.53               | 0.01 | 0.000          | 0.56               | 0.06 | 0.000          | 0.46     | 0.02 | 0.000          | 4        | PTC+; ds splice junctions                                                     | Alt 3' ss in IVS2 adds 14 nt to transcript                                             | 492       | 22              |
| 50          | 190            | <b>A15g43910</b> | pfkB-type carbohydrate kinase family protein                                                                                                                                                                                                                                                                                     | 0.35    | 0.02 | 0.48               | 0.04 | 0.005          | 0.56               | 0.02 | 0.000          | 0.44     | 0.03 | 0.033          | 12       | PTC+; ds splice junctions                                                     | Alt 3' ss in exon 10 removes 31 nt                                                     | 351       | 130             |
| 72          | 190            | <b>A12g04790</b> | Unknown protein - similar to unnamed protein product [Vitis vinifera] (GB:CAO23994.1)                                                                                                                                                                                                                                            | 0.29    | 0.02 | 0.46               | 0.04 | 0.000          | 0.53               | 0.04 | 0.000          | 0.38     | 0.01 | 0.007          | 4        | PTC+; ds splice junctions                                                     | Alt 5' ss in IVS2 adds 23 nt                                                           | 348       | 133             |
| 110         | 380            | <b>A11g72050</b> | TFIIIA (TRANSCRIPTION FACTOR IIIA) - zinc finger (C2H2 type) family protein/ required for transcription of 5S rRNA genes                                                                                                                                                                                                         | 0.61    | 0.06 | 0.72               | 0.06 | 0.064          | 0.86               | 0.05 | 0.000          | 0.91     | 0.01 | 0.000          | 6 or 7   | PTC+; ds splice junctions                                                     | Alt 3' ss and Alt 5' ss leave 175 nt of IVS2                                           | 1329      | 242             |
| 121         | 228            | <b>A12g18300</b> | Basic helix-loop-helix (bHLH) family protein; transcription factor involved in response to cytokinin stimulus                                                                                                                                                                                                                    | 0.80    | 0.07 | 0.88               | 0.02 | 0.076          | 0.89               | 0.01 | 0.050          | 0.89     | 0.01 | 0.060          | 6        | No reason for NMD from AS event                                               | Alt 3' ss in IVS 4 adds 6 nt in frame                                                  |           |                 |
| 125         | 251            | <b>A12g46790</b> | APRR9 (PSEUDO-RESPONSE REGULATOR 9) - transcription regulator/clock function - essential to temperature-sensitive circadian system                                                                                                                                                                                               | 0.22    | 0.02 | 0.32               | 0.01 | 0.007          | 0.47               | 0.02 | 0.000          | 0.37     | 0.01 | 0.000          | 7        | PTC+; ds splice junctions                                                     | Alt 5' ss in IVS2 adds 8 nt of IVS2                                                    | 1218      | 184             |
| 143         | 329            | <b>A13g12250</b> | TGA6 (TGA1-related gene 6); DNA binding/basic leucine zipper transcription factor/ activation of SA-responsive genes factor                                                                                                                                                                                                      | 0.03    | 0.01 | 0.08               | 0.01 | 0.003          | 0.11               | 0.02 | 0.000          | 0.07     | 0.01 | 0.016          | 9        | PTC+; ds splice junctions                                                     | Alt 5' ss in IVS2 adds 109 nt of IVS2                                                  | 1421      | 364             |
| 193         | 294            | <b>A11g07350</b> | Pre-mRNA splicing factor - Transformer serine/arginine-rich ribonucleoprotein, putative                                                                                                                                                                                                                                          | 0.27    | 0.02 | 0.34               | 0.02 | 0.067          | 0.48               | 0.07 | 0.000          | 0.56     | 0.02 | 0.000          | 7 or 8   | PTC+; ds splice junctions                                                     | Alt 3' ss and alt 5' ss adds exon of 9nt from IVS4                                     | 1072      | 307             |
| 194         | 366            | <b>A13g49430</b> | SR34A (SER/ARG-RICH PROTEIN 34A) - pre-mRNA splicing factor - SR protein                                                                                                                                                                                                                                                         | 0.07    | 0.01 | 0.21               | 0.03 | 0.002          | 0.35               | 0.08 | 0.000          | 0.30     | 0.03 | 0.000          | 30       | uORFs of 10, 30 and 61 aas - 61 aa uORF overlaps AUG of main ORF/stops at AUG | Alt 3' ss and 5' ss includes 224 nt of IVS1                                            |           |                 |
| 206         | 349            | <b>A12g21660</b> | ATGRP7 (GLYCINE-RICH RNA-BINDING PROTEIN 7), CCR2 (COLD-CIRCADIAN RHYTHM AND RNA BINDING 2) - RNA binding/ double-stranded DNA binding/ single-stranded DNA binding/ regulates circadian oscillations of GRP7/GRP8 transcript/ cold-induced/ response to salt and dehydration stress conditions/ mediates innate immune response | 0.02    | 0.00 | 0.07               | 0.03 | 0.031          | 0.16               | 0.08 | 0.000          | 0.13     | 0.00 | 0.004          | 2        | PTC+; no ds splice junctions; long 3'UTR                                      | Alt 5' ss in IVS1 (only intron) adds 166 nt                                            | 778       | 228             |
| 219         | 382            | <b>A14g25500</b> | RS40 - pre-mRNA splicing factor/ SR protein/ RNA binding (previously ATRSP35 [Arabidopsis thaliana arginine/serine-rich splicing factor 35])                                                                                                                                                                                     | 0.14    | 0.05 | 0.33               | 0.07 | 0.002          | 0.54               | 0.07 | 0.000          | 0.34     | 0.03 | 0.001          | 6        | PTC+; ds splice junctions                                                     | Alt 3' and 5' ss in IVS2 includes new exon of 257 nt                                   | 1390      | 197             |
| 220         | 590            | <b>A13g55460</b> | SCL30 (SC35-LIKE SPLICING FACTOR 30) - pre-mRNA splicing factor/ SR protein/ RNA binding                                                                                                                                                                                                                                         | 0.01    | 0.00 | 0.05               | 0.01 | 0.057          | 0.11               | 0.04 | 0.000          | 0.08     | 0.01 | 0.003          | 8        | PTC+; ds splice junctions                                                     | Alt 3' ss and alt 5' ss leaves 449nt of IVS3                                           | 1184      | 261             |
| 224         | 236            | <b>A11g15200</b> | Pinin - exon junction complex protein; protein-protein interaction regulator family protein                                                                                                                                                                                                                                      | 0.11    | 0.02 | 0.19               | 0.03 | 0.051          | 0.27               | 0.04 | 0.002          | 0.39     | 0.04 | 0.000          | 10       | PTC+; ds splice junctions                                                     | Alt 3' ss and alt 5' ss leaves 104 nt of IVS8                                          | 686       | 141             |
| 237         | 273            | <b>A11g07830</b> | RPL29 - ribosomal protein L29 family protein                                                                                                                                                                                                                                                                                     | 0.02    | 0.00 | 0.05               | 0.01 | 0.016          | 0.09               | 0.01 | 0.000          | 0.07     | 0.02 | 0.001          | 4        | uORF of 20 aas - predicted                                                    | Alt 5' ss in IVS1                                                                      |           |                 |
| 241         | 119            | <b>A11g02090</b> | FUSS (FUSCA 5), CSN7 (COP9 SIGNALOSOME SUBUNIT 7), COP15 (CONSTITUTIVE PHOTOMORPHOGENIC 15) - MAP kinase kinase/ phosphoprotein                                                                                                                                                                                                  | 0.15    | 0.08 | 0.27               | 0.01 | 0.060          | 0.29               | 0.02 | 0.006          | 0.30     | 0.01 | 0.001          | 9        | PTC+; ds splice junctions                                                     | Alt 3' ss in exon 8 removes 17 nt                                                      | 290       | 202             |
| 244         | 131            | <b>A15g09230</b> | SR12 - member of SIR2 (sirtuin) family histone deacetylases (HDAC) - chromatin silencing/ DNA binding                                                                                                                                                                                                                            | 0.26    | 0.02 | 0.33               | 0.01 | 0.060          | 0.49               | 0.06 | 0.000          | 0.48     | 0.02 | 0.000          | 11       | PTC+; ds splice junctions                                                     | Alt 5' ss in IVS5 adds 11 nt from IVS                                                  | 913       | 176             |
| 245         | 138            | <b>A15g46110</b> | APE2 - ACCLIMATION OF PHOTOSYNTHESIS TO ENVIRONMENT 2 - antiporter/ triose-phosphate transmembrane transporter/ involved in acclimation responses                                                                                                                                                                                | 0.01    | 0.01 | 0.05               | 0.00 | 0.013          | 0.12               | 0.03 | 0.000          | 0.11     | 0.01 | 0.000          | 12       | PTC+; ds splice junctions                                                     | Alt 5' ss in IVS1 adds 7nt                                                             | 1402      | 444             |
| 282         | 471            | <b>A15g63120</b> | RH30 - ethylene-responsive putative DEAD box RNA helicase                                                                                                                                                                                                                                                                        | 0.05    | 0.01 | 0.10               | 0.02 | 0.037          | 0.17               | 0.04 | 0.000          | 0.21     | 0.02 | 0.000          | 10       | PTC+; ds splice junctions                                                     | Alt 5' ss adds 294 nt from IVS8                                                        | 836       | 215             |
| 285         | 207            | <b>A13g19840</b> | PRP40C - Pre-mRNA-processing protein 40C/ binds CTD of RNA polymerase II/ scaffold for RNA processing machinery/ FF domain-containing protein / WW domain-containing protein                                                                                                                                                     | 0.66    | 0.01 | 0.72               | 0.03 | 0.016          | 0.81               | 0.03 | 0.000          | 0.87     | 0.01 | 0.000          | 13       | PTC+; ds splice junctions                                                     | Alt 5' ss in IVS2 adds 36 nt - No 3'UTR in TAIR                                        | 1800      |                 |
| 298         | 219            | <b>A15g09880</b> | RNA recognition motif (RRM)-containing protein                                                                                                                                                                                                                                                                                   | 0.14    | 0.00 | 0.19               | 0.01 | 0.081          | 0.23               | 0.03 | 0.002          | 0.22     | 0.02 | 0.007          | 13       | PTC+; ds splice junctions                                                     | Alt 3' ss and alt 5' ss in IVS4 leaves 76nt of IVS4 in transcript                      | 1171      | 204             |
| 301         | 275            | <b>A15g09790</b> | ATXR5/SDG15 (SETDOMAIN GROUP 15) - contains SET-domain and PCNA-binding domain/ DNA binding/ possible role in cell-cycle regulation or progression.                                                                                                                                                                              | 0.03    | 0.00 | 0.07               | 0.01 | 0.001          | 0.09               | 0.00 | 0.000          | 0.06     | 0.01 | 0.002          | 5        | PTC+; ds splice junctions                                                     | Predicted - Alt 5' ss in exon 1 removes 7 nt and alt 3' ss in exon 2 removes 3nt       | 930       | 233             |
| 309         | 223            | <b>A15g65060</b> | MAF3 - MADS AFFECTING FLOWERING 3 - MADS domain protein/flowering regulator/ transcription factor/ closely related to FLC                                                                                                                                                                                                        | 0.19    | 0.01 | 0.35               | 0.01 | 0.000          | 0.42               | 0.00 | 0.000          | 0.38     | 0.02 | 0.000          | 7        | PTC+; ds splice junctions                                                     | Alt 3' ss in exon 4 removes 38 nt                                                      | 446       | 250             |
| 310         | 368            | <b>A15g65070</b> | MAF4 - MADS AFFECTING FLOWERING 4 - MADS domain protein/flowering regulator/ transcription factor/ closely related to FLC                                                                                                                                                                                                        | 0.02    | 0.01 | 0.06               | 0.01 | 0.007          | 0.07               | 0.01 | 0.003          | 0.10     | 0.02 | 0.000          | 7 or 8   | PTC+; ds splice junctions                                                     | Exon 2 and 3 skip                                                                      | 518       | 165             |
| 327         | 421            | <b>A15g59950</b> | Aly/REF - RNA and export factor-binding protein, putative                                                                                                                                                                                                                                                                        | 0.16    | 0.04 | 0.30               | 0.04 | 0.021          | 0.47               | 0.05 | 0.000          | 0.41     | 0.08 | 0.001          | 5        | PTC+; ds splice junctions                                                     | IVS1 retained (196nt)                                                                  | 1063      | 354             |
| 344         | 195            | <b>A13g29160</b> | AKIN11 (ARABIDOPSIS SNF1 KINASE HOMOLOG 11) - SNF1-related protein kinase - interacts with SCF subunit SKP1/ASK1 and 20S proteasome subunit PAD1                                                                                                                                                                                 | 0.08    | 0.01 | 0.12               | 0.01 | 0.057          | 0.17               | 0.02 | 0.000          | 0.15     | 0.02 | 0.002          | 11       | PTC+; ds splice junctions                                                     | Alt 3' ss in exon 9 removes 5 nt                                                       | 722       | 268             |
| 345         | 274            | <b>A11g49730</b> | Protein kinase family protein                                                                                                                                                                                                                                                                                                    | 0.08    | 0.01 | 0.16               | 0.02 | 0.012          | 0.21               | 0.06 | 0.001          | 0.20     | 0.02 | 0.001          | 9 or 10  | PTC+; ds splice junctions                                                     | Alt 3' ss in IVS6 adds 37 nt                                                           | 773       | 112             |
| 370         | 120            | <b>A15g35410</b> | SOS2 (SALT OVERLY SENSITIVE 2), CIPK24 (CBL-INTERACTING PROTEIN KINASE 24) - kinase/ regulatory component controlling plant potassium nutrition                                                                                                                                                                                  | 0.42    | 0.01 | 0.49               | 0.01 | 0.020          | 0.59               | 0.03 | 0.000          | 0.63     | 0.01 | 0.000          | 14       | PTC+; ds splice junctions                                                     | Alt 3' ss in IVS8 adds 5 nt                                                            | 775       | 233             |
| 375         | 195            | <b>A13g20270</b> | Lipid-binding serum glycoprotein family protein                                                                                                                                                                                                                                                                                  | 0.54    | 0.01 | 0.62               | 0.03 | 0.004          | 0.64               | 0.01 | 0.000          | 0.59     | 0.01 | 0.053          | 11       | uORF of 22 aas overlaps start of main ORF                                     | Fully spliced                                                                          |           | 80              |
| 378         | 218            | <b>A13g62190</b> | DNAJ heat shock N-terminal domain-containing protein                                                                                                                                                                                                                                                                             | 0.09    | 0.00 | 0.13               | 0.01 | 0.095          | 0.16               | 0.01 | 0.004          | 0.17     | 0.01 | 0.002          | 6        | PTC+; ds splice junctions                                                     | IVS4 (75 nt) retained                                                                  | 1091      | 718             |
| 384         | 149            | <b>A14g02200</b> | Drought-induced-19-like 1 - drought-responsive family protein                                                                                                                                                                                                                                                                    | 0.06    | 0.01 | 0.13               | 0.02 | 0.032          | 0.21               | 0.03 | 0.000          | 0.22     | 0.03 | 0.000          | 5 or 6   | PTC+; ds splice junctions                                                     | Alt 5' ss in IVS2 adds 32 nt                                                           | 496       | 114             |
| 393         | 565            | <b>A12g26150</b> | ATHSF42 (Arabidopsis thaliana HEAT SHOCK TRANSCRIPTION FACTOR A2) - DNA binding/ involved in response to misfolded protein accumulation in the cytosol                                                                                                                                                                           | 0.66    | 0.05 | 0.79               | 0.02 | 0.008          | 0.84               | 0.01 | 0.001          | 0.85     | 0.01 | 0.001          | 2 or 3   | PTC+; ds splice junctions                                                     | Alt 3' and alt 5' splice sites add 31 nt of IVS1 as a mini-exon.                       | 1217      | 179             |

#### Peaks that change significantly in both *upf* mutants

| Primer pair | Band Size (bp) | Gene Identifier  | Gene name/function                                                                                                                                 | Wt mean | SE   | <i>upf1-5</i> mean | SE   | <i>p</i> <=0.1 | <i>upf3-1</i> mean | SE   | <i>p</i> <=0.1 | CHX mean | SE   | <i>p</i> <=0.1 | Exon No. | Transcript features                      | AS event                                               | PTC to pA | Auth stop to pA |
|-------------|----------------|------------------|----------------------------------------------------------------------------------------------------------------------------------------------------|---------|------|--------------------|------|----------------|--------------------|------|----------------|----------|------|----------------|----------|------------------------------------------|--------------------------------------------------------|-----------|-----------------|
| 106         | 236            | <b>A11g49950</b> | TRB1 - TELOMERE REPEAT BINDING FACTOR 1 - telomeric DNA binding protein/ DNA binding / transcription factor                                        | 0.08    | 0.01 | 0.13               | 0.00 | 0.001          | 0.12               | 0.01 | 0.006          | 0.10     | 0.01 | >0.1           | 7        | No reason for NMD from AS event - uORFs  | Alt 5' ss in IVS1 leaves 45 nt of IVS1 in transcript   |           |                 |
| 109         | 118            | <b>A11g77080</b> | FLM (FLOWERING LOCUS M), MAF1 (MADS AFFECTING FLOWERING 1) - MADS domain protein/flowering regulator/ transcription factor/ closely related to FLC | 0.14    | 0.03 | 0.22               | 0.05 | 0.070          | 0.29               | 0.05 | 0.003          | 0.19     | 0.02 | >0.1           | 7        | PTC+; ds splice junctions                | Alt 3' ss removes 38 nt from exon 4.                   | 468       | 251             |
| 141         | 202            | <b>A13g51880</b> | HMG81 (HIGH MOBILITY GROUP B 1), NFD1 (NUCLEOSOME/CHROMATIN ASSEMBLY FACTOR D1) - transcription factor                                             | 0.88    | 0.06 | 0.94               | 0.01 | 0.012          | 0.94               | 0.01 | 0.011          | 0.90     | 0.01 | >0.1           | 8        | No reason for NMD from AS event          | Alt 5' ss in exon 7 in frame                           |           |                 |
| 200         | 104            | <b>A11g79880</b> | La domain-containing protein                                                                                                                       | 0.08    | 0.02 | 0.13               | 0.02 | 0.041          | 0.13               | 0.02 | 0.044          | 0.06     | 0.01 | >0.1           | 11       | PTC+; ds splice junctions                | Alt 3' ss in exon 2 removes 17 nt                      | 1401      | 194             |
| 229         | 153            | <b>A14g35785</b> | Transformer serine/arginine-rich ribonucleoprotein; Nucleic acid binding / nucleotide binding                                                      | 0.07    | 0.01 | 0.11               | 0.01 | 0.020          | 0.12               | 0.01 | 0.001          | 0.07     | 0.01 | >0.1           | 8        | PTC+; no ds splice junctions; long 3'UTR | Alt 3' ss and alt 5' ss adds alternative exon of 37 nt | 441       | 248             |

## Supplemental Table 2

| Primer pair | Band Size (bp) | Gene Identifier  | Gene name/function                                                                                                                                                                                                                                               | WT mean | SE   | upf1-5 mean | SE   | p <= 0.1 | upf3-1 mean | SE   | p <= 0.1 | CHX mean | SE   | p <= 0.1 | Transcript features | AS event                                                                                  | PTC to pA                                                          | Auth stop to pA |     |
|-------------|----------------|------------------|------------------------------------------------------------------------------------------------------------------------------------------------------------------------------------------------------------------------------------------------------------------|---------|------|-------------|------|----------|-------------|------|----------|----------|------|----------|---------------------|-------------------------------------------------------------------------------------------|--------------------------------------------------------------------|-----------------|-----|
| 229         | 281            | <b>A14g35785</b> | Transformer serine/arginine-rich ribonucleoprotein; Nucleic acid binding / nucleotide binding                                                                                                                                                                    | 0.10    | 0.00 | 0.13        | 0.02 | 0.019    | 0.14        | 0.01 | 0.003    | 0.12     | 0.01 | >0.1     | 8                   | PTC+; no ds splice junctions; long 3'UTR                                                  | All 3' ss and alt 5' ss adds alternative exon of 166 nt            | 441             | 248 |
| 251         | 106            | <b>A11g37150</b> | HCS2 (HOLOCARBOXYLASE SYNTHETASE 2) - catalytic/ involved in protein modification - biotin-[acetyl-CoA:carboxylase] ligase activity; correct development of lateral organs in association with shoot maturation in the reproductive phase (with SPL10 and SPL11) | 0.20    | 0.06 | 0.33        | 0.07 | 0.093    | 0.43        | 0.07 | 0.007    | 0.24     | 0.03 | >0.1     | 10                  | PTC+; ds splice junctions                                                                 | All 3' ss in exon 9 which removes 28 nt from the transcript.       | 116             | 48  |
| 324         | 270            | <b>A15g43270</b> |                                                                                                                                                                                                                                                                  | 0.07    | 0.01 | 0.11        | 0.01 | 0.086    | 0.11        | 0.02 | 0.062    | 0.07     | 0.01 | >0.1     | 5                   | uORFs of 9, 12 and 5 aas                                                                  | All 5' ss in IVS1 (5'UTR intron) leaves 84 nt of IVS in transcript |                 |     |
| 372         | 314            | <b>A11g76460</b> | RNA recognition motif (RRM)-containing protein                                                                                                                                                                                                                   | 0.05    | 0.01 | 0.08        | 0.01 | 0.081    | 0.12        | 0.00 | 0.001    | 0.08     | 0.02 | >0.1     | 8                   | PTC+; ds splice junctions<br>uORFs of 38 and 73 aas - 73 aa uORF overlaps AUG of main ORF | All 3' ss in IVS1 adds 54 nt to transcript                         | 1340            | 650 |
| 374         | 399            | <b>A14g36960</b> | RNA recognition motif (RRM)-containing protein                                                                                                                                                                                                                   | 0.05    | 0.01 | 0.15        | 0.02 | 0.005    | 0.32        | 0.05 | 0.000    | 0.09     | 0.01 | >0.1     | 13                  |                                                                                           | IVS1 (5' UTR) retained                                             |                 |     |

### Peaks that change significantly in upf3-1 and CHX treatment

| Primer pair | Band Size (bp) | Gene Identifier  | Gene name/function                                                                                                                                                                                    | WT mean | SE   | upf1-5 mean | SE   | p <= 0.1 | upf3-1 mean | SE   | p <= 0.1 | CHX mean | SE   | p <= 0.1 | Transcript features | AS event                                                    | PTC to pA                                                                                                 | Auth stop to pA |     |
|-------------|----------------|------------------|-------------------------------------------------------------------------------------------------------------------------------------------------------------------------------------------------------|---------|------|-------------|------|----------|-------------|------|----------|----------|------|----------|---------------------|-------------------------------------------------------------|-----------------------------------------------------------------------------------------------------------|-----------------|-----|
| 7           | 361            | <b>A11g55310</b> | SCL33, SR33 (SC35-like splicing factor 33) - pre-mRNA splicing factor/ SR protein/ RNA binding                                                                                                        | 0.15    | 0.01 | 0.19        | 0.01 | >0.1     | 0.32        | 0.09 | 0.001    | 0.47     | 0.04 | 0.027    | 11 or 12            | PTC+; ds splice junctions                                   | All 3' ss in IVS3 adds 162 nt to transcript from IVS3                                                     | 875             | 203 |
| 7           | 364            | <b>A11g55310</b> | SCL33, SR33 (SC35-like splicing factor 33) - pre-mRNA splicing factor/ SR protein/ RNA binding                                                                                                        | 0.02    | 0.00 | 0.03        | 0.00 | >0.1     | 0.05        | 0.02 | 0.001    | 0.08     | 0.00 | 0.058    | 11 or 12            | PTC+; ds splice junctions                                   | All 3' ss and alt 5' ss adds 165nt of IVS3 - also alt 3' ss (NAGNAG) in IVS3 adds 165 nt                  | 974             | 203 |
| 47          | 203            | <b>A15g20250</b> | DIN10 (DARK INDUCIBLE 10) - member of glycosyl hydrolase family 36/ hydrolyzing O-glycosyl compounds                                                                                                  | 0.24    | 0.02 | 0.28        | 0.01 | >0.1     | 0.33        | 0.01 | 0.001    | 0.33     | 0.00 | 0.001    | 5                   | uORF of 90 aas - overlaps AUG of main ORF                   | Fully spliced                                                                                             |                 |     |
| 58          | 237            | <b>A15g65050</b> | MAF2 (MADS AFFECTING FLOWERING 2), AGL31 (AGAMOUS LIKE MADS-BOX PROTEIN 31) - transcription factor/ MADS box genes involved in control of flowering time                                              | 0.02    | 0.00 | 0.04        | 0.00 | 0.000    | 0.05        | 0.01 | 0.000    | 0.06     | 0.00 | 0.000    | 7                   | PTC+; ds splice junctions                                   | All 3' ss in exon 5 removes 4nt                                                                           | 388             | 212 |
| 82          | 213            | <b>A13g14230</b> | RAP2.2 - member of the ERF (ethylene response factor) subfamily B-2 of ERF/AP2 transcription factor family/ DNA binding                                                                               | 0.14    | 0.00 | 0.13        | 0.01 | >0.1     | 0.18        | 0.01 | 0.009    | 0.17     | 0.01 | 0.018    | 3                   | SJ 45 nt downstream (-50-55nt); Long 3' UTR                 | All 5' ss in exon 1 removes 12 nt and alt 3' ss in exon 2 removes 3nt in frame                            |                 | 372 |
| 86          | 396            | <b>A14g16845</b> | VRN2 (REDUCED VERNALIZATION RESPONSE 2) - transcription factor/ mediates vernalization/ encodes zinc finger protein similar to Polycomb group (PcG) proteins/ maintains FLC repression cold treatment | 0.07    | 0.00 | 0.09        | 0.00 | >0.1     | 0.12        | 0.02 | 0.008    | 0.13     | 0.01 | 0.002    | 15                  | PTC+; ds splice junctions                                   | All 5' ss in IVS5 adds 22nt of IVS5 to transcript and alt 3' ss in exon 5 removes 4 nt and IVS2 unspliced | 1522            | 153 |
| 90          | 316            | <b>A14g39260</b> | ATGRP8 ( GLYCINE-RICH RNA-BINDING PROTEIN 8), CCR1 (COLD-CIRCADIAN RHYTHM AND RNA BINDING 1) - regulates circadian oscillations of GRP7/GRP8 transcripts/ cold-induced/ RNA binding                   | 0.03    | 0.00 | 0.05        | 0.01 | >0.1     | 0.12        | 0.04 | 0.003    | 0.14     | 0.02 | 0.001    | 2 or 3              | PTC+; ds splice junctions                                   | All 5' ss in IVS1 leaves 158 nt of intron                                                                 | 779             | 267 |
| 118         | 233            | <b>A12g02960</b> | Zinc finger (C3HC4-type RING finger) family protein                                                                                                                                                   | 0.03    | 0.00 | 0.05        | 0.00 | >0.1     | 0.07        | 0.01 | 0.002    | 0.07     | 0.01 | 0.001    | 6                   | uORFs of 8 and 26 aas; 26 aa uORF overlaps AUG of main ORF  | Predicted alt 3' ss in IVS1 adds 37 nt                                                                    |                 |     |
| 118         | 237            | <b>A12g02960</b> | Zinc finger (C3HC4-type RING finger) family protein                                                                                                                                                   | 0.04    | 0.00 | 0.05        | 0.00 | >0.1     | 0.07        | 0.01 | 0.010    | 0.07     | 0.01 | 0.007    | 6                   | uORFs of 8 and 26 aas; 26 uORF overlaps AUG of main ORF     | Predicted alt 3' ss in IVS1 adds 41 nt                                                                    |                 |     |
| 131         | 373            | <b>A12g38880</b> | NF-YB1 (NUCLEAR FACTOR Y SUBUNIT B1), HAP3A (HEME ACTIVATOR PROTEIN (YEAST) HOMOLOG 3A) - transcription factor/ confers drought tolerance                                                             | 0.21    | 0.02 | 0.26        | 0.02 | >0.1     | 0.30        | 0.03 | 0.069    | 0.41     | 0.06 | 0.001    | 7                   | Intron in 3'UTR                                             | All 5' ss in IVS6 which adds 62 nt to transcript                                                          |                 |     |
| 195         | 156            | <b>A13g01150</b> | PTB1 - POLYPYRIMIDINE TRACT-BINDING PROTEIN 1 - pre-mRNA splicing - role in pollen germination                                                                                                        | 0.10    | 0.03 | 0.12        | 0.02 | >0.1     | 0.16        | 0.02 | 0.021    | 0.19     | 0.02 | 0.001    | 9                   | PTC+; no ds splice junction - possible long 3'UTR           | All 5' ss in exon 8 removes 47 nt of exon 8                                                               | 370             | 162 |
| 196         | 268            | <b>A13g01150</b> | PTB1 - POLYPYRIMIDINE TRACT-BINDING PROTEIN 1 - pre-mRNA splicing - role in pollen germination                                                                                                        | 0.11    | 0.02 | 0.17        | 0.03 | >0.1     | 0.25        | 0.07 | 0.016    | 0.37     | 0.05 | 0.000    | 9                   | PTC+; ds splice junctions                                   | All 3' ss and alt 5' ss includes 102 nt from IVS2                                                         | 1050            | 162 |
| 202         | 351            | <b>A13g13570</b> | SCL30A (SC35-LIKE SPLICING FACTOR 30A) - pre-mRNA splicing factor/ SR protein/ RNA binding                                                                                                            | 0.18    | 0.01 | 0.30        | 0.01 | >0.1     | 0.48        | 0.12 | 0.002    | 0.52     | 0.05 | 0.001    | 6                   | PTC+; ds splice junctions                                   | IVS3                                                                                                      | 958             | 266 |
| 204         | 376            | <b>A13g53500</b> | RS2Z32 - pre-mRNA splicing factor / SR protein/ nucleic acid binding                                                                                                                                  | 0.09    | 0.01 | 0.11        | 0.03 | >0.1     | 0.25        | 0.06 | 0.000    | 0.40     | 0.02 | 0.000    | 7                   | PTC+; ds splice junctions                                   | All 3' ss in IVS2 leaves 218 of IVS2 in transcript                                                        | 1122            | 214 |
| 205         | 556            | <b>A13g61860</b> | RS31 (ARGININE/SERINE-RICH SPLICING FACTOR 31) - pre-mRNA splicing factor/ SR protein/ RNA binding                                                                                                    | 0.01    | 0.00 | 0.04        | 0.00 | >0.1     | 0.10        | 0.04 | 0.012    | 0.27     | 0.07 | 0.000    | 6                   | PTC+; ds splice junctions                                   | All 3' ss adding 513 nt from IVS2 plus alt 5' ss in IVS2 removes another 120 nt at 3' end of IVS2         | 1215            | 243 |
| 209         | 227            | <b>A12g16940</b> | RNA recognition motif (RRM)-containing protein                                                                                                                                                        | 0.06    | 0.01 | 0.07        | 0.01 | >0.1     | 0.13        | 0.04 | 0.001    | 0.19     | 0.01 | 0.000    | 14                  | Unknown                                                     |                                                                                                           |                 |     |
| 213         | 198            | <b>A15g53180</b> | PTB2, POLYPYRIMIDINE TRACT-BINDING PROTEIN 2 - pre-mRNA splicing - role in pollen germination                                                                                                         | 0.08    | 0.01 | 0.12        | 0.02 | >0.1     | 0.19        | 0.07 | 0.008    | 0.31     | 0.02 | 0.000    | 9                   | PTC+; ds splice junctions                                   | All 5' and 3' adds 58nt from IVS3                                                                         | 1109            | 213 |
| 213         | 201            | <b>A15g53180</b> | PTB2, POLYPYRIMIDINE TRACT-BINDING PROTEIN 2 - pre-mRNA splicing - role in pollen germination                                                                                                         | 0.06    | 0.00 | 0.09        | 0.01 | >0.1     | 0.14        | 0.05 | 0.006    | 0.22     | 0.01 | 0.000    | 9                   | PTC+; ds splice junctions                                   | All 5' and 3' adds 61nt from IVS3                                                                         | 1112            | 213 |
| 217         | 175            | <b>A11g16610</b> | SR45 (ARGININE/SERINE-RICH 45), RNPS1 - pre-mRNA splicing factor/ exon junction complex protein/ heterochromatic siRNA pathway/ involved in plant sugar response                                      | 0.68    | 0.02 | 0.71        | 0.03 | >0.1     | 0.72        | 0.01 | 0.062    | 0.77     | 0.02 | 0.001    | 12                  | No reason for NMD from AS event                             |                                                                                                           |                 |     |
| 218         | 134            | <b>A12g30260</b> | U2B' (U2 SMALL NUCLEAR RIBONUCLEOPROTEIN B') - component of the U2 snRNP complex/ RNA binding                                                                                                         | 0.05    | 0.00 | 0.09        | 0.01 | >0.1     | 0.19        | 0.03 | 0.000    | 0.17     | 0.02 | 0.000    | 5                   | PTC+; ds splice junctions                                   | All 5' ss removes 35 nt from exon 2                                                                       | 729             | 195 |
| 220         | 673            | <b>A13g55460</b> | SCL30 (SC35-LIKE SPLICING FACTOR 30) - pre-mRNA splicing factor / SR protein/ RNA binding                                                                                                             | 0.01    | 0.00 | 0.02        | 0.00 | >0.1     | 0.05        | 0.03 | 0.008    | 0.13     | 0.02 | 0.000    | 8                   | Unknown                                                     |                                                                                                           |                 |     |
| 223         | 202            | <b>A12g29210</b> | Splicing factor PWI domain-containing protein                                                                                                                                                         | 0.36    | 0.04 | 0.36        | 0.08 | >0.1     | 0.59        | 0.02 | 0.009    | 0.63     | 0.04 | 0.004    | 11                  | PTC+; ds splice junctions                                   | All 3' ss in IVS5 which adds 50 nt from IVS5                                                              | 2327            | 180 |
| 226         | 143            | <b>A14g24740</b> | AF2C (ARABIDOPSIS FUS3-COMPLEMENTING GENE 2) - LAMMER kinase/ putative role in phosphorylation of SR protein splicing factors                                                                         | 0.11    | 0.01 | 0.17        | 0.04 | >0.1     | 0.27        | 0.02 | 0.002    | 0.19     | 0.02 | 0.075    | 12                  | PTC+; ds splice junctions                                   | Exons 5 and 6 skipped - removes 164 nt                                                                    | 810             | 200 |
| 229         | 302            | <b>A14g35785</b> | Transformer serine/arginine-rich ribonucleoprotein; Nucleic acid binding / nucleotide binding                                                                                                         | 0.02    | 0.00 | 0.03        | 0.00 | 0.058    | 0.05        | 0.01 | 0.001    | 0.07     | 0.00 | 0.000    | 8                   | PTC+; ds splice junctions                                   | All 3' ss and alt 5' ss adds alternative exon of 187 nt                                                   | 531             | 248 |
| 268         | 109            | <b>A11g03457</b> | RNA-binding protein, putative                                                                                                                                                                         | 0.22    | 0.05 | 0.27        | 0.02 | >0.1     | 0.44        | 0.12 | 0.045    | 0.68     | 0.08 | 0.001    | 9                   | Unknown                                                     |                                                                                                           |                 |     |
| 278         | 221            | <b>A12g02570</b> | SPF30 - Nucleic acid binding                                                                                                                                                                          | 0.00    | 0.00 | 0.01        | 0.00 | >0.1     | 0.03        | 0.01 | 0.004    | 0.06     | 0.01 | 0.000    | 9                   | Unknown                                                     |                                                                                                           |                 |     |
| 279         | 341            | <b>A13g25840</b> | Protein kinase family protein                                                                                                                                                                         | 0.10    | 0.01 | 0.09        | 0.01 | >0.1     | 0.14        | 0.01 | 0.061    | 0.22     | 0.03 | 0.000    | 14                  | PTC+; ds splice junctions                                   | All 3' and 5' SS adds 56 nt from IVS1                                                                     | 2828            | 330 |
| 280         | 357            | <b>A15g11200</b> | UAP56a - DEAD/DEAH box helicase - exon junction protein                                                                                                                                               | 0.07    | 0.02 | 0.11        | 0.02 | >0.1     | 0.18        | 0.04 | 0.001    | 0.25     | 0.01 | 0.000    | 15                  | PTC+; ds splice junctions                                   | All 3' ss in IVS3 adds 136 nt to transcript.                                                              | 1521            | 329 |
| 283         | 480            | <b>A13g01540</b> | DRH1 (DEAD BOX RNA HELICASE 1)                                                                                                                                                                        | 0.01    | 0.00 | 0.02        | 0.00 | >0.1     | 0.05        | 0.02 | 0.009    | 0.06     | 0.01 | 0.001    | 9                   | PTC+; ds splice junctions                                   | All 3' ss in IVS4 leaves 345 nt of IVS4                                                                   | 1772            | 326 |
| 284         | 290            | <b>A14g33060</b> | CYP57 (Cyclophilin 57; Peptidyl-prolyl cis-trans isomerase cyclophilin-type family protein)                                                                                                           | 0.26    | 0.05 | 0.34        | 0.03 | >0.1     | 0.49        | 0.06 | 0.002    | 0.71     | 0.04 | 0.000    | 10                  | PTC+; ds splice junctions                                   | All 3' and alt 5' ss in IVS5 which adds 87 nt to transcript.                                              | 1112            | 269 |
| 284         | 295            | <b>A14g33060</b> | CYP57 (Cyclophilin 57; Peptidyl-prolyl cis-trans isomerase cyclophilin-type family protein)                                                                                                           | 0.05    | 0.01 | 0.06        | 0.00 | >0.1     | 0.08        | 0.01 | 0.017    | 0.11     | 0.01 | 0.000    | 10                  | PTC+; ds splice junctions                                   | All 3' and alt 5' ss in IVS5 which adds 92 nt to transcript.                                              | 1066            | 269 |
| 298         | 299            | <b>A15g09880</b> | RNA recognition motif (RRM)-containing protein                                                                                                                                                        | 0.10    | 0.01 | 0.11        | 0.01 | >0.1     | 0.18        | 0.06 | 0.018    | 0.33     | 0.01 | 0.000    | 13                  | PTC+; ds splice junctions                                   | Two alt 3' ss and alt 5' ss includes two new exons of 76 and 81 nt in IVS4                                | 1252            | 204 |
| 303         | 171            | <b>A13g46460</b> | UBC13 (UBIQUITIN-CONJUGATING ENZYME 13) - ubiquitin protein ligase                                                                                                                                    | 0.08    | 0.01 | 0.10        | 0.01 | >0.1     | 0.14        | 0.02 | 0.078    | 0.20     | 0.02 | 0.017    | 6                   | PTC+; ds splice junction                                    | All 5' ss in IVS4 which adds 31 nt to transcript                                                          | 391             | 240 |
| 306         | 218            | <b>A12g46830</b> | CCA1, CIRCADIAN CLOCK ASSOCIATED 1 - transcription factor/ Myb-like transcriptional repressor in regulating circadian rhythms/ binds evening element in TOC1 to repress TOC1                          | 0.79    | 0.03 | 0.85        | 0.04 | >0.1     | 0.87        | 0.05 | 0.047    | 0.89     | 0.01 | 0.019    | 8                   | No reason for NMD from AS event - other AS/NMD events known | Fully spliced                                                                                             |                 |     |



## Supplemental Table 2

| Primer pair | Band Size (bp) | Gene Identifier  | Gene name/function                                                                                                                                                | Wt mean | SE   | upf1-5 mean | SE   | p <=0.1 | upf3-1 mean | SE   | p <=0.1 | CHX mean | SE   | p <=0.1 | Transcript features | AS event                                                    | PTC to pA                                                                                     | Auth stop to pA |     |
|-------------|----------------|------------------|-------------------------------------------------------------------------------------------------------------------------------------------------------------------|---------|------|-------------|------|---------|-------------|------|---------|----------|------|---------|---------------------|-------------------------------------------------------------|-----------------------------------------------------------------------------------------------|-----------------|-----|
| 309         | 219            | <b>A15g65060</b> | MAF3 - MADS AFFECTING FLOWERING 3 - MADS domain protein/flowering regulator/ transcription factor/ closely related to FLC                                         | 0.04    | 0.00 | 0.06        | 0.00 | 0.006   | 0.08        | 0.00 | 0.000   | 0.07     | 0.01 | 0.000   | 7                   | PTC+; ds splice junctions                                   | Alt 3'ss in exon 4 removes 38 nt from exon 4 plus alt 3'ss in exon 5 removes 4 nt from exon 5 | 442             | 250 |
| 313         | 346            | <b>A15g37055</b> | SEF (SERRATED LEAVES AND EARLY FLOWERING), SWC6 (homologue of yeast SWC6 protein) - conserved subunit of SWR1/SRCAP complex.                                      | 0.02    | 0.00 | 0.04        | 0.00 | 0.001   | 0.05        | 0.00 | 0.000   | 0.05     | 0.00 | 0.000   | 4                   | PTC+; ds splice junctions                                   | Alt 3'ss in exon 2 removes 10 nt                                                              | 354             | 83  |
| 316         | 262            | <b>A12g28550</b> | TOE1 (TARGET OF EAT1 1), RAP2.7 (RELATED TO AP2.7) - DNA binding/transcription factor                                                                             | 0.93    | 0.01 | 0.94        | 0.01 | >0.1    | 0.96        | 0.02 | 0.071   | 0.97     | 0.00 | 0.013   | 8                   | No reason for NMD                                           | Fully spliced                                                                                 |                 | 217 |
| 332         | 568            | <b>A13g16800</b> | PP2C (Protein phosphatase 2C), putative                                                                                                                           | 0.05    | 0.00 | 0.07        | 0.01 | 0.037   | 0.10        | 0.01 | 0.000   | 0.10     | 0.01 | 0.000   | 6                   | PTC+; ds splice junctions                                   | IVS 2 retained                                                                                | 1253            | 262 |
| 343         | 159            | <b>A13g29160</b> | AKIN11 (ARABIDOPSIS SNF1 KINASE HOMOLOG 11) - SNF1-related protein kinase - interacts with SCF subunit SKP1/ASK1 and 20S proteasome subunit PAD1                  | 0.27    | 0.03 | 0.27        | 0.02 | >0.1    | 0.34        | 0.06 | 0.088   | 0.40     | 0.01 | 0.005   | 11                  | No reason for NMD from AS event - other AS/NMD events known | Fully spliced                                                                                 |                 |     |
| 347         | 221            | <b>A14g34460</b> | AGB1 (GTP BINDING PROTEIN BETA 1), ELK4 (ERECTA-LIKE 4) - heterotrimeric G-protein beta subunit involved in organ shape/ nucleotide binding                       | 0.01    | 0.00 | 0.02        | 0.01 | >0.1    | 0.04        | 0.02 | 0.041   | 0.05     | 0.01 | 0.004   | 6                   | PTC+ - predicted transcript                                 | Predicted alt 5'ss and alt 3'ss in IVS4                                                       | 388             | 287 |
| 360         | 343            | <b>A13g06510</b> | SFR2 (SENSITIVE TO FREEZING 2) - encodes protein with beta-glucosidase activity/ hydrolase - hydrolyzing O-glycosyl compounds/ freezing response                  | 0.01    | 0.00 | 0.02        | 0.00 | 0.004   | 0.04        | 0.01 | 0.000   | 0.04     | 0.00 | 0.000   | 9 or 10             | PTC+; ds splice junctions                                   | Alt 3'ss IVS6 adds 28 nt                                                                      | 886             | 141 |
| 360         | 307            | <b>A13g06510</b> | SFR2 (SENSITIVE TO FREEZING 2) - encodes protein with beta-glucosidase activity/ hydrolase - hydrolyzing O-glycosyl compounds/ freezing response                  | 0.02    | 0.01 | 0.04        | 0.03 | 0.048   | 0.06        | 0.02 | 0.000   | 0.10     | 0.07 | 0.000   | 9 or 10             | PTC+; ds splice junctions                                   | Alt 3'ss in exon 7 removes 7 nt from exon 7                                                   | 848             | 141 |
| 363         | 337            | <b>A15g24270</b> | SOS3 (SALT OVERLY SENSITIVE 3), CBL4 (CALCINEURIN B-LIKE PROTEIN 4) - encodes a calcium sensor essential for K+ nutrition, K+/Na+ selectivity, and salt tolerance | 0.06    | 0.01 | 0.08        | 0.01 | >0.1    | 0.13        | 0.05 | 0.008   | 0.25     | 0.02 | 0.000   | 9                   | PTC+; ds splice junctions                                   | Alt 5'ss in IVS5 adds 29 nt - No 3'UTR in TAIR                                                |                 |     |
| 383         | 143            | <b>A12g43640</b> | SRP14, signal recognition particle 14 kDa family protein                                                                                                          | 0.07    | 0.01 | 0.09        | 0.01 | 0.091   | 0.12        | 0.03 | 0.006   | 0.11     | 0.01 | 0.013   | 5                   | uORF of 19 aas overlaps with AUG of main ORF                | Alt 5'ss in IVS1 and exon 2 skip                                                              |                 |     |

### Peaks that change significantly in upf 1-5 only

| Primer pair | Band Size (bp) | Gene Identifier  | Gene name/function                                                                                         | Wt mean | SE   | upf1-5 mean | SE   | p <=0.1 | upf3-1 mean | SE   | p <=0.1 | CHX mean | SE   | p <=0.1 | Transcript features | AS event                  | PTC to pA                                                                                     | Auth stop to pA |     |
|-------------|----------------|------------------|------------------------------------------------------------------------------------------------------------|---------|------|-------------|------|---------|-------------|------|---------|----------|------|---------|---------------------|---------------------------|-----------------------------------------------------------------------------------------------|-----------------|-----|
| 124         | 140            | <b>A12g37060</b> | NF-YB8, NUCLEAR FACTOR Y, SUBUNIT B8                                                                       | 0.07    | 0.04 | 0.21        | 0.07 | 0.059   | 0.15        | 0.05 | >0.1    | 0.13     | 0.03 | >0.1    | 7                   | Unknown                   |                                                                                               |                 |     |
| 249         | 174            | <b>A11g72560</b> | PSD, PAUSED - encodes a karyopherin/ ortholog of LOS1/XPO7/ IRNA binding/ mediates nuclear export of tRNAs | 0.04    | 0.00 | 0.15        | 0.10 | 0.028   | 0.04        | 0.01 | >0.1    | 0.05     | 0.00 | >0.1    | 14                  | Intron in 3' UTR          | Alt 5'ss in 3'UTR intron adds 25 nt - distance from authentic stop to splice junction is 68nt |                 |     |
| 254         | 198            | <b>A15g50240</b> | PIMT2 (PROTEIN-L-ISOAASPARTATE METHYLTRANSFERASE 2)                                                        | 0.19    | 0.04 | 0.41        | 0.16 | 0.081   | 0.15        | 0.07 | >0.1    | 0.10     | 0.02 | >0.1    | 4                   | Unknown                   |                                                                                               |                 |     |
| 311         | 462            | <b>A15g50580</b> | MAF5 (MADS AFFECTING FLOWERING 5)                                                                          | 0.76    | 0.04 | 0.82        | 0.02 | 0.089   | 0.80        | 0.01 | >0.1    | 0.75     | 0.02 | >0.1    | 7                   | PTC+; ds splice junctions | Alt 3' SS in exon 5 removes 4 nt                                                              | 433             | 254 |

### Peaks that change significantly in upf 3-1 only

| Primer pair | Band Size (bp) | Gene Identifier  | Gene name/function                                                                                                                                                              | Wt mean | SE   | upf1-5 mean | SE   | p <=0.1 | upf3-1 mean | SE   | p <=0.1 | CHX mean | SE   | p <=0.1 | Transcript features | AS event                                                    | PTC to pA                                                | Auth stop to pA |     |
|-------------|----------------|------------------|---------------------------------------------------------------------------------------------------------------------------------------------------------------------------------|---------|------|-------------|------|---------|-------------|------|---------|----------|------|---------|---------------------|-------------------------------------------------------------|----------------------------------------------------------|-----------------|-----|
| 7           | 293            | <b>A11g55310</b> | SCL33, SR33 (SC35-like splicing factor 33) - pre-mRNA splicing factor/ SR protein/ RNA binding                                                                                  | 0.05    | 0.00 | 0.08        | 0.01 | >0.1    | 0.09        | 0.01 | 0.035   | 0.07     | 0.01 | 0.074   | 6                   | Unknown                                                     |                                                          |                 |     |
| 12          | 215            | <b>A11g72320</b> | APUM23 (ARABIDOPSIS PUMILIO 23) - member of Pumilio RNA-binding protein family/ regulates mRNA stability and translation by sequence-specific binding to 3' UTR of target mRNAs | 0.53    | 0.11 | 0.66        | 0.05 | >0.1    | 0.68        | 0.02 | 0.097   | 0.61     | 0.08 | >0.1    | 6                   | No reason for NMD from AS event                             |                                                          |                 |     |
| 19          | 202            | <b>A12g32330</b> | Unknown protein                                                                                                                                                                 | 0.34    | 0.02 | 0.39        | 0.02 | >0.1    | 0.42        | 0.01 | 0.019   | 0.35     | 0.02 | >0.1    | 15                  | PTC+; ds splice junctions                                   | Alt 3'ss in exon 10 that removes 71 nt                   | 931             | 339 |
| 43          | 112            | <b>A15g09230</b> | SRT2 - member of SIR2 (sirtuin) family histone deacetylases (HDAC) - chromatin silencing/ DNA binding                                                                           | 0.13    | 0.00 | 0.08        | 0.03 | >0.1    | 0.23        | 0.03 | 0.045   | 0.18     | 0.01 | >0.1    | 11                  | No reason for NMD from AS event - other AS/NMD events known | Exon 2 skip - incl. AUG                                  |                 |     |
| 108         | 259            | <b>A11g30200</b> | F-box family protein                                                                                                                                                            | 0.37    | 0.01 | 0.39        | 0.01 | >0.1    | 0.41        | 0.01 | 0.034   | 0.39     | 0.01 | >0.1    | 2                   | No reason for NMD from AS event                             | Transcripts have long 3'UTRs - do not correlate with NMD | 473             |     |
| 128         | 381            | <b>A12g15530</b> | zinc finger (C3HC4-type RING finger) family protein                                                                                                                             | 0.17    | 0.00 | 0.19        | 0.02 | >0.1    | 0.22        | 0.03 | 0.046   | 0.20     | 0.01 | >0.1    | 7                   | No reason for NMD from AS event - uORFs                     | Multiple small uORFs in 5' UTR of fully spliced and AS   |                 |     |
| 160         | 341            | <b>A14g14410</b> | basic helix-loop-helix (bHLH) family protein                                                                                                                                    | 0.06    | 0.02 | 0.10        | 0.02 | >0.1    | 0.36        | 0.21 | 0.014   | 0.08     | 0.02 | >0.1    | 5                   | PTC+; ds splice junctions                                   | Alt 3'ss in IVS1 adds 157 nt                             | 1095            | 164 |
| 168         | 145            | <b>A15g18240</b> | MYR1 (MYB-RELATED PROTEIN 1) - transcription factor                                                                                                                             | 0.20    | 0.01 | 0.28        | 0.04 | >0.1    | 0.34        | 0.08 | 0.032   | 0.14     | 0.02 | >0.1    | 7                   | Long 3'UTR - predicted AS event                             | Alt 3'ss removes 23 nt from exon 7                       | 930             | 332 |
| 236         | 267            | <b>A11g04950</b> | TAf6 (TBP-ASSOCIATED FACTOR 6), TAFI59 (TATA BOX ASSOCIATED FACTOR II 59) - transcription initiation factor/ mutant is embryo lethal/ reduced pollen growth                     | 0.03    | 0.01 | 0.04        | 0.00 | >0.1    | 0.08        | 0.02 | 0.019   | 0.05     | 0.01 | >0.1    | 13                  | uORF of 17aa - correlates with NMD                          |                                                          |                 |     |
| 256         | 259            | <b>A11g54080</b> | UBP1A, OLIGOURIDYLATE-BINDING PROTEIN 1A - mRNA 3'-UTR binding                                                                                                                  | 0.22    | 0.06 | 0.25        | 0.05 | >0.1    | 0.48        | 0.20 | 0.096   | 0.20     | 0.09 | >0.1    | 12                  | No reason for NMD from AS event                             | Alt 3'ss in exon 7 removes 12 nt (in frame).             |                 |     |
| 259         | 214            | <b>A13g17090</b> | PP2C (Protein phosphatase 2C) family protein                                                                                                                                    | 0.07    | 0.00 | 0.11        | 0.06 | >0.1    | 0.23        | 0.03 | 0.040   | 0.14     | 0.05 | >0.1    | 4                   | PTC+; ds splice junctions                                   | Alt 3'ss in IVS1 adds 17 nt                              | 1103            | 306 |
| 281         | 170            | <b>A15g47210</b> | Nuclear RNA-binding protein, putative                                                                                                                                           | 0.08    | 0.02 | 0.07        | 0.03 | >0.1    | 0.17        | 0.08 | 0.062   | 0.04     | 0.01 | >0.1    | 7                   | PTC+; no ds splice junction - possible long 3' UTR          | Alt 3'ss in exon 7 removes 8 nt                          | 366             | 200 |
| 299         | 189            | <b>A15g11330</b> | Monooxygenase family protein                                                                                                                                                    | 0.01    | 0.00 | 0.02        | 0.01 | 0.028   | 0.04        | 0.01 | 0.000   | 0.02     | 0.00 | 0.010   | 4                   | PTC+; ds splice junctions                                   | Alt 3'ss removes 170 nt from exon 2                      | 857             | 127 |
| 332         | 399            | <b>A13g16800</b> | Protein phosphatase 2C                                                                                                                                                          | 0.05    | 0.01 | 0.06        | 0.01 | >0.1    | 0.09        | 0.01 | 0.006   | 0.06     | 0.01 | >0.1    | 6                   | Unknown                                                     |                                                          |                 |     |
| 372         | 268            | <b>A11g76460</b> | RNA recognition motif (RRM)-containing protein                                                                                                                                  | 0.04    | 0.00 | 0.05        | 0.00 | 0.001   | 0.07        | 0.00 | 0.000   | 0.04     | 0.00 | 0.076   | 8                   | PTC+; ds splice junctions                                   | Alt 3'ss in IVS1 adds 9 nt to transcript                 | 1301            | 650 |

### Peaks that change significantly in CHX treatment only

| Primer pair | Band Size (bp) | Gene Identifier  | Gene name/function                                                                                                                                                                    | Wt mean | SE   | upf1-5 mean | SE   | p <=0.1 | upf3-1 mean | SE   | p <=0.1 | CHX mean | SE   | p <=0.1 | Transcript features | AS event                                              | PTC to pA                                  | Auth stop to pA |     |
|-------------|----------------|------------------|---------------------------------------------------------------------------------------------------------------------------------------------------------------------------------------|---------|------|-------------|------|---------|-------------|------|---------|----------|------|---------|---------------------|-------------------------------------------------------|--------------------------------------------|-----------------|-----|
| 30          | 264            | <b>A13g53270</b> | Unknown protein - similar to unnamed protein product [Vitis vinifera] (GB:CA065717.1); contains domain PTHR15131 (PTHR15131)                                                          | 0.25    | 0.02 | 0.19        | 0.01 | 0.098   | 0.22        | 0.05 | >0.1    | 0.37     | 0.01 | 0.006   | 9                   | No reason for NMD from AS event                       | Alt 3'ss in IVS1 (5'UTR intron) - no uORFs |                 |     |
| 49          | 346            | <b>A15g41150</b> | RAD1, UVH1 (ULTRAVIOLET HYPERSENSITIVE 1) - DNA repair/ confers resistance to UV radiation                                                                                            | 0.20    | 0.03 | 0.24        | 0.06 | >0.1    | 0.28        | 0.03 | >0.1    | 0.34     | 0.06 | 0.096   | 11                  | PTC+; ds splice junctions                             | Alt 3'ss in IVS5 adds 53 nt                | 1020            | 280 |
| 58          | 241            | <b>A15g65050</b> | MAF2 (MADS AFFECTING FLOWERING 2), AGL31 (AGAMOUS LIKE MADS-BOX PROTEIN 31) - transcription factor/ MADS box genes involved in control of flowering time                              | 0.30    | 0.03 | 0.26        | 0.02 | >0.1    | 0.28        | 0.04 | >0.1    | 0.39     | 0.01 | 0.011   | 7                   | No reason for NMD - AS events elsewhere in transcript | Fully spliced                              |                 |     |
| 58          | 351            | <b>A15g65050</b> | MAF2 (MADS AFFECTING FLOWERING 2), AGL31 (AGAMOUS LIKE MADS-BOX PROTEIN 31) - transcription factor/ MADS box genes involved in control of flowering time                              | 0.00    | 0.00 | 0.01        | 0.00 | >0.1    | 0.02        | 0.01 | 0.015   | 0.04     | 0.01 | 0.000   | 7                   | PTC+; ds splice junctions                             | Predicted - Alt 5'ss in IVS2 adds 109nt    | 660             | 212 |
| 59          | 182            | <b>A15g66010</b> | RNA binding protein                                                                                                                                                                   | 0.37    | 0.08 | 0.27        | 0.03 | >0.1    | 0.27        | 0.04 | >0.1    | 0.52     | 0.06 | 0.049   |                     |                                                       |                                            |                 |     |
| 68          | 190            | <b>A11g23970</b> | Unknown protein                                                                                                                                                                       | 0.74    | 0.01 | 0.72        | 0.00 | >0.1    | 0.73        | 0.00 | >0.1    | 0.79     | 0.01 | 0.001   |                     |                                                       |                                            |                 |     |
| 70          | 152            | <b>A11g54360</b> | TAf6B1/TAf6B2/TAf6B3/TAf6B4 (TBP-ASSOCIATED FACTOR 6B1) - similar to histone fold TBP-associated factor TAf6/ RNA polymerase II transcription factor/ transcription initiation factor | 0.89    | 0.01 | 0.88        | 0.00 | >0.1    | 0.88        | 0.01 | >0.1    | 0.92     | 0.01 | 0.053   |                     |                                                       |                                            |                 |     |
| 111         | 186            | <b>A11g61660</b> | Basic helix-loop-helix (bHLH) family protein                                                                                                                                          | 0.06    | 0.01 | 0.06        | 0.01 | >0.1    | 0.08        | 0.02 | >0.1    | 0.12     | 0.03 | 0.030   |                     |                                                       |                                            |                 |     |

# Supplemental Table 2

|     |     |                  |                                                                                                                                                                                                                                            |      |      |      |      |       |      |      |       |      |      |       |          |                           |  |  |  |                                                                                  |                                       |     |
|-----|-----|------------------|--------------------------------------------------------------------------------------------------------------------------------------------------------------------------------------------------------------------------------------------|------|------|------|------|-------|------|------|-------|------|------|-------|----------|---------------------------|--|--|--|----------------------------------------------------------------------------------|---------------------------------------|-----|
| 116 | 338 | <b>A11q18660</b> | Zinc finger (C3HC4-type RING finger) family protein                                                                                                                                                                                        | 0.06 | 0.04 | 0.11 | 0.00 | >0.1  | 0.11 | 0.01 | >0.1  | 0.12 | 0.00 | 0.071 |          |                           |  |  |  |                                                                                  |                                       |     |
| 118 | 289 | <b>A12q02960</b> | Zinc finger (C3HC4-type RING finger) family protein                                                                                                                                                                                        | 0.25 | 0.01 | 0.30 | 0.03 | >0.1  | 0.33 | 0.02 | >0.1  | 0.51 | 0.06 | 0.000 | 6        |                           |  |  |  | uORFs of 8 and 26 aas; 26 uORF overlaps auth AUG of main ORF.                    | Predicted alt 3'ss in IVS1 adds 92 nt |     |
| 122 | 275 | <b>A12q36010</b> | E2F3 (E2F TRANSCRIPTION FACTOR 3) - transcription factor/ cell cycle genes, key components of the cyclin D/retinoblastoma/E2F pathway.                                                                                                     | 0.55 | 0.01 | 0.55 | 0.01 | >0.1  | 0.54 | 0.01 | >0.1  | 0.62 | 0.00 | 0.000 |          |                           |  |  |  |                                                                                  |                                       |     |
| 128 | 363 | <b>A12q15530</b> | Zinc finger (C3HC4-type RING finger) family protein                                                                                                                                                                                        | 0.15 | 0.01 | 0.15 | 0.01 | >0.1  | 0.15 | 0.01 | >0.1  | 0.22 | 0.03 | 0.002 |          |                           |  |  |  |                                                                                  |                                       |     |
| 129 | 230 | <b>A12q40830</b> | RHC1A (RING-H2 finger protein C1A), putative - cell wall/ protein binding / zinc ion binding                                                                                                                                               | 0.12 | 0.01 | 0.13 | 0.01 | >0.1  | 0.13 | 0.01 | >0.1  | 0.24 | 0.02 | 0.000 |          |                           |  |  |  |                                                                                  |                                       |     |
| 136 | 240 | <b>A13q07740</b> | ADA2A (HOMOLOG OF YEAST ADA2 2A) - DNA binding/ transcription factor/ transcriptional adaptor ADA2a that interacts with histone acetyltransferase GCN5 homolog and CBF1/ response to cold                                                  | 0.01 | 0.00 | 0.03 | 0.01 | >0.1  | 0.04 | 0.02 | >0.1  | 0.05 | 0.02 | 0.097 |          |                           |  |  |  |                                                                                  |                                       |     |
| 155 | 178 | <b>A14q27050</b> | F-box family protein                                                                                                                                                                                                                       | 0.33 | 0.05 | 0.36 | 0.07 | >0.1  | 0.33 | 0.05 | >0.1  | 0.47 | 0.01 | 0.090 |          |                           |  |  |  |                                                                                  |                                       |     |
| 155 | 233 | <b>A14q27050</b> | F-box family protein                                                                                                                                                                                                                       | 0.11 | 0.00 | 0.11 | 0.01 | >0.1  | 0.13 | 0.03 | >0.1  | 0.19 | 0.01 | 0.003 |          |                           |  |  |  |                                                                                  |                                       |     |
| 171 | 221 | <b>A15q18620</b> | CHR17 (CHROMATIN REMODELING FACTOR 17) - DNA-dependent ATPase                                                                                                                                                                              | 0.26 | 0.01 | 0.26 | 0.01 | >0.1  | 0.28 | 0.01 | >0.1  | 0.29 | 0.00 | 0.013 |          |                           |  |  |  |                                                                                  |                                       |     |
| 174 | 224 | <b>A15q13220</b> | JAS1 (JASMONATE-ASSOCIATED 1), JAZ10 (JASMONATE-ZIM-DOMAIN PROTEIN 10) - regulation of systemic acquired resistance/ response to jasmonic acid stimulus and wounding                                                                       | 0.34 | 0.02 | 0.35 | 0.00 | >0.1  | 0.36 | 0.04 | >0.1  | 0.47 | 0.01 | 0.000 |          |                           |  |  |  |                                                                                  |                                       |     |
| 182 | 241 | <b>A15q16820</b> | HSF3 (HEAT SHOCK FACTOR 3) - DNA binding / transcription factor/ not induced by heat/ required early in heat stress response                                                                                                               | 0.66 | 0.01 | 0.66 | 0.00 | >0.1  | 0.66 | 0.01 | >0.1  | 0.69 | 0.00 | 0.003 |          |                           |  |  |  |                                                                                  |                                       |     |
| 193 | 297 | <b>A11q07350</b> | Pre-mRNA splicing factor - Transformer serine/arginine-rich ribonucleoprotein                                                                                                                                                              | 0.03 | 0.00 | 0.03 | 0.00 | >0.1  | 0.05 | 0.01 | 0.001 | 0.06 | 0.00 | 0.000 |          |                           |  |  |  |                                                                                  |                                       |     |
| 198 | 129 | <b>A14q36690</b> | ATUZAF65A - spliceosomal protein/ RNA binding                                                                                                                                                                                              | 0.43 | 0.08 | 0.44 | 0.06 | >0.1  | 0.51 | 0.09 | >0.1  | 0.61 | 0.07 | 0.043 |          |                           |  |  |  |                                                                                  |                                       |     |
| 209 | 209 | <b>A12q16940</b> | RNA recognition motif (RRM)-containing protein                                                                                                                                                                                             | 0.02 | 0.00 | 0.02 | 0.00 | >0.1  | 0.03 | 0.01 | 0.003 | 0.05 | 0.00 | 0.000 | 14       | PTC+: ds splice junctions |  |  |  | Alt 3' and alt 5' ss adds 70 nt from IVS-2                                       | 1505                                  | 262 |
| 212 | 332 | <b>A14q02430</b> | SR34b - pre-mRNA splicing factor/ SR protein                                                                                                                                                                                               | 0.00 | 0.00 | 0.00 | 0.00 | >0.1  | 0.01 | 0.01 | >0.1  | 0.08 | 0.02 | 0.000 |          |                           |  |  |  |                                                                                  |                                       |     |
| 212 | 389 | <b>A14q02430</b> | SR34b - pre-mRNA splicing factor/ SR protein                                                                                                                                                                                               | 0.04 | 0.02 | 0.02 | 0.01 | >0.1  | 0.05 | 0.03 | >0.1  | 0.16 | 0.02 | 0.001 |          |                           |  |  |  |                                                                                  |                                       |     |
| 225 | 300 | <b>A13q53570</b> | AF1 (ARABIDOPSIS FUS3-COMPLEMENTING GENE 1) - member of LAMMER kinase (CDC2-related) subfamily/ activates STE12-dependent functions in yeast                                                                                               | 0.01 | 0.00 | 0.01 | 0.00 | >0.1  | 0.01 | 0.01 | >0.1  | 0.05 | 0.01 | 0.001 |          |                           |  |  |  |                                                                                  |                                       |     |
| 229 | 414 | <b>A14q35785</b> | Transformer serine/arginine-rich ribonucleoprotein; Nucleic acid binding / nucleotide binding                                                                                                                                              | 0.36 | 0.04 | 0.41 | 0.05 | >0.1  | 0.43 | 0.04 | >0.1  | 0.53 | 0.04 | 0.004 | 8        | PTC+: ds splice junctions |  |  |  | Alt 3'ss in IVS6 adds 298nt to transcript                                        | 642                                   | 248 |
| 236 | 295 | <b>A11q04950</b> | TAF6 (TBP-ASSOCIATED FACTOR 6), TAFII59 (TATA BOX ASSOCIATED FACTOR II 59) - transcription initiation factor/ mutant is embryo lethal/ reduced pollen growth                                                                               | 0.02 | 0.02 | 0.04 | 0.03 | >0.1  | 0.03 | 0.01 | >0.1  | 0.12 | 0.08 | 0.016 |          |                           |  |  |  |                                                                                  |                                       |     |
| 282 | 366 | <b>A15q63120</b> | RH30 - ethylene-responsive putative DEAD box RNA helicase                                                                                                                                                                                  | 0.00 | 0.00 | 0.00 | 0.00 | >0.1  | 0.01 | 0.00 | 0.013 | 0.04 | 0.01 | 0.000 | 10 or 11 | PTC+: ds splice junctions |  |  |  | Alt 3'ss and alt 5'ss include an additional exon of 187nt in IVS8                | 723                                   | 215 |
| 283 | 387 | <b>A13q01540</b> | DRH1 (DEAD BOX RNA HELICASE 1)                                                                                                                                                                                                             | 0.00 | 0.00 | 0.01 | 0.00 | >0.1  | 0.02 | 0.01 | 0.003 | 0.03 | 0.00 | 0.000 |          | PTC+: ds splice junctions |  |  |  | Alt 3'ss and alt 5'ss include an additional exon of 252 nt of IVS4 in transcript | 1772                                  | 326 |
| 283 | 349 | <b>A13q01540</b> | DRH1 (DEAD BOX RNA HELICASE 1)                                                                                                                                                                                                             | 0.01 | 0.00 | 0.01 | 0.00 | >0.1  | 0.03 | 0.02 | 0.011 | 0.04 | 0.00 | 0.000 |          |                           |  |  |  |                                                                                  |                                       |     |
| 288 | 189 | <b>A13q12570</b> | FYD - in chloroplast envelope                                                                                                                                                                                                              | 0.57 | 0.03 | 0.56 | 0.02 | >0.1  | 0.63 | 0.03 | >0.1  | 0.66 | 0.03 | 0.026 |          |                           |  |  |  |                                                                                  |                                       |     |
| 289 | 141 | <b>A13q12570</b> | FYD - in chloroplast envelope                                                                                                                                                                                                              | 0.11 | 0.00 | 0.08 | 0.01 | 0.052 | 0.09 | 0.03 | 0.078 | 0.20 | 0.01 | 0.001 |          |                           |  |  |  |                                                                                  |                                       |     |
| 289 | 259 | <b>A13q12570</b> | FYD - in chloroplast envelope                                                                                                                                                                                                              | 0.08 | 0.01 | 0.07 | 0.01 | >0.1  | 0.08 | 0.01 | >0.1  | 0.11 | 0.01 | 0.061 |          |                           |  |  |  |                                                                                  |                                       |     |
| 298 | 341 | <b>A15q09880</b> | RNA recognition motif (RRM)-containing protein                                                                                                                                                                                             | 0.00 | 0.00 | 0.00 | 0.00 | >0.1  | 0.01 | 0.00 | >0.1  | 0.04 | 0.02 | 0.002 | 13       | PTC+: ds splice junctions |  |  |  | Three alt 3'ss and alt 5'ss includes three new exons of 76, 40 and 81 nt in IVS4 | 1263                                  | 204 |
| 298 | 464 | <b>A15q09880</b> | RNA recognition motif (RRM)-containing protein                                                                                                                                                                                             | 0.00 | 0.00 | 0.00 | 0.00 | >0.1  | 0.01 | 0.00 | >0.1  | 0.03 | 0.01 | 0.000 | 13       | PTC+: ds splice junctions |  |  |  | Two alt 3'ss and alt 5'ss includes two new exons of 240 and 81 nt in IVS4        | 1387                                  | 204 |
| 310 | 509 | <b>A15q65070</b> | MAF4 - MADS AFFECTING FLOWERING 4 - MADS domain protein/flowering regulator/ transcription factor/ closely related to FLC                                                                                                                  | 0.02 | 0.01 | 0.01 | 0.00 | >0.1  | 0.01 | 0.01 | >0.1  | 0.05 | 0.01 | 0.009 |          |                           |  |  |  |                                                                                  |                                       |     |
| 312 | 469 | <b>A15q13790</b> | AGL15 (AGAMOUS-LIKE 15) - DNA binding/ transcription factor/ member of the MADS domain family of regulatory factors                                                                                                                        | 0.29 | 0.01 | 0.30 | 0.02 | >0.1  | 0.30 | 0.02 | >0.1  | 0.34 | 0.01 | 0.031 |          |                           |  |  |  |                                                                                  |                                       |     |
| 313 | 355 | <b>A15q37055</b> | SEF (SERRATED LEAVES AND EARLY FLOWERING), SWC6 (homologue of yeast SWC6 protein) - conserved subunit of SWR1/SRCAP complex.                                                                                                               | 0.79 | 0.01 | 0.78 | 0.01 | >0.1  | 0.77 | 0.01 | >0.1  | 0.84 | 0.01 | 0.049 |          |                           |  |  |  |                                                                                  |                                       |     |
| 321 | 348 | <b>A14q27410</b> | RD26 (RESPONSIVE TO DESICCATION 26) - NAC transcription factor/ transcriptional activator in ABA-mediated dehydration response                                                                                                             | 0.01 | 0.01 | 0.01 | 0.00 | >0.1  | 0.03 | 0.02 | >0.1  | 0.05 | 0.03 | 0.063 |          |                           |  |  |  |                                                                                  |                                       |     |
| 322 | 399 | <b>A12q33480</b> | ANAC041 (NAC DOMAIN CONTAINING PROTEIN 41) - transcription factor                                                                                                                                                                          | 0.60 | 0.02 | 0.57 | 0.02 | >0.1  | 0.61 | 0.05 | >0.1  | 0.73 | 0.00 | 0.004 |          |                           |  |  |  |                                                                                  |                                       |     |
| 324 | 503 | <b>A15q43270</b> | SPL2 (SQUAMOSA PROMOTER BINDING PROTEIN-LIKE 2) - DNA binding / transcription factor/ controls correct development of lateral organs in association with shoot maturation in the reproductive phase (with SPL10 and SPL11)                 | 0.24 | 0.14 | 0.10 | 0.03 | >0.1  | 0.11 | 0.05 | >0.1  | 0.45 | 0.10 | 0.066 |          |                           |  |  |  |                                                                                  |                                       |     |
| 326 | 147 | <b>A11q69250</b> | NTF2 (nuclear transport factor 2) family protein - RNA recognition motif (RRM)-containing protein                                                                                                                                          | 0.92 | 0.01 | 0.92 | 0.00 | >0.1  | 0.94 | 0.00 | 0.047 | 0.96 | 0.00 | 0.000 |          |                           |  |  |  |                                                                                  |                                       |     |
| 330 | 118 | <b>A13q10300</b> | Calcium-binding EF hand family protein                                                                                                                                                                                                     | 0.18 | 0.03 | 0.21 | 0.06 | >0.1  | 0.23 | 0.08 | >0.1  | 0.34 | 0.04 | 0.035 |          |                           |  |  |  |                                                                                  |                                       |     |
| 335 | 327 | <b>A15q66210</b> | CPK28 (calcium-dependent protein kinase 28) - calmodulin-dependent protein kinase/ member of Calcium Dependent Protein Kinase family                                                                                                       | 0.01 | 0.00 | 0.01 | 0.00 | >0.1  | 0.01 | 0.01 | >0.1  | 0.07 | 0.02 | 0.001 |          |                           |  |  |  |                                                                                  |                                       |     |
| 335 | 295 | <b>A15q66210</b> | CPK28 (calcium-dependent protein kinase 28) - calmodulin-dependent protein kinase/ member of Calcium Dependent Protein Kinase family                                                                                                       | 0.05 | 0.00 | 0.05 | 0.01 | >0.1  | 0.06 | 0.01 | >0.1  | 0.09 | 0.01 | 0.025 |          |                           |  |  |  |                                                                                  |                                       |     |
| 338 | 253 | <b>A15q57630</b> | CKP21 (CBL-INTERACTING PROTEIN KINASE 21), SNRK3.4 (SNF1-RELATED PROTEIN KINASE 3.4) - CBL-interacting protein kinase                                                                                                                      | 0.62 | 0.03 | 0.62 | 0.01 | >0.1  | 0.64 | 0.04 | >0.1  | 0.81 | 0.01 | 0.000 |          |                           |  |  |  |                                                                                  |                                       |     |
| 346 | 285 | <b>A14q23260</b> | CRK18 (CYSTEINE-RICH RLK [RECEPTOR-LIKE PROTEIN KINASE] 18 - cysteine-rich receptor-like protein kinase/ response to ABA                                                                                                                   | 0.09 | 0.02 | 0.09 | 0.01 | >0.1  | 0.17 | 0.05 | 0.097 | 0.34 | 0.03 | 0.000 |          |                           |  |  |  |                                                                                  |                                       |     |
| 348 | 416 | <b>A14q34460</b> | AGB1 (GTP BINDING PROTEIN BETA 1), ELK4 (ERECTA-LIKE 4) - heterotrimeric G-protein beta subunit involved in organ shape/ nucleotide binding                                                                                                | 0.01 | 0.00 | 0.01 | 0.00 | >0.1  | 0.02 | 0.01 | >0.1  | 0.05 | 0.01 | 0.000 |          |                           |  |  |  |                                                                                  |                                       |     |
| 360 | 314 | <b>A13q06510</b> | SRF2 (SENSITIVE TO FREEZING 2) - encodes protein with beta-glucosidase activity/ hydrolase - hydrolyzing O-glucosyl compounds/ freezing response                                                                                           | 0.83 | 0.02 | 0.83 | 0.01 | >0.1  | 0.82 | 0.01 | >0.1  | 0.90 | 0.01 | 0.002 |          |                           |  |  |  |                                                                                  |                                       |     |
| 362 | 459 | <b>A14q26070</b> | MEK1 (MAP KINASE/ ERK KINASE 1), MKK1 (MITOGEN ACTIVATED PROTEIN KINASE KINASE 1) - MAP Kinase Kinase/ stress-activated MAPK pathway/ phosphorylates the MAPK AIMP4 in response to stress/ phosphorylated by MEK1 in response to wounding. | 0.48 | 0.09 | 0.44 | 0.13 | >0.1  | 0.63 | 0.08 | >0.1  | 0.74 | 0.05 | 0.066 |          |                           |  |  |  |                                                                                  |                                       |     |
| 362 | 548 | <b>A14q26070</b> | MEK1 (MAP KINASE/ ERK KINASE 1), MKK1 (MITOGEN ACTIVATED PROTEIN KINASE KINASE 1) - MAP Kinase Kinase/ stress-activated MAPK pathway/ phosphorylates the MAPK AIMP4 in response to stress/ phosphorylated by MEK1 in response to wounding. | 0.03 | 0.01 | 0.03 | 0.01 | >0.1  | 0.04 | 0.01 | >0.1  | 0.06 | 0.01 | 0.005 |          |                           |  |  |  |                                                                                  |                                       |     |
| 373 | 267 | <b>A13q13224</b> | RNA recognition motif (RRM)-containing protein                                                                                                                                                                                             | 0.90 | 0.02 | 0.89 | 0.01 | >0.1  | 0.90 | 0.01 | >0.1  | 0.96 | 0.01 | 0.001 |          |                           |  |  |  |                                                                                  |                                       |     |
| 376 | 135 | <b>A11q64625</b> | Transcription factor                                                                                                                                                                                                                       | 0.26 | 0.02 | 0.23 | 0.03 | >0.1  | 0.27 | 0.05 | >0.1  | 0.37 | 0.01 | 0.009 |          |                           |  |  |  |                                                                                  |                                       |     |
| 380 | 167 | <b>A15q08185</b> | MIR162A, MICRORNA 162A - targets DCL1                                                                                                                                                                                                      | 0.14 | 0.02 | 0.13 | 0.01 | >0.1  | 0.15 | 0.02 | >0.1  | 0.18 | 0.01 | 0.075 |          |                           |  |  |  |                                                                                  |                                       |     |
| 380 | 170 | <b>A15q08185</b> | MIR162A, MICRORNA 162A - targets DCL1                                                                                                                                                                                                      | 0.16 | 0.02 | 0.16 | 0.03 | >0.1  | 0.17 | 0.03 | >0.1  | 0.22 | 0.03 | 0.073 |          |                           |  |  |  |                                                                                  |                                       |     |
| 384 | 110 | <b>A14q02200</b> | Drought-induced-19-like 1 - drought-responsive family protein                                                                                                                                                                              | 0.01 | 0.00 | 0.01 | 0.00 | >0.1  | 0.02 | 0.01 | >0.1  | 0.04 | 0.01 | 0.009 |          |                           |  |  |  |                                                                                  |                                       |     |
| 385 | 256 | <b>A12q43810</b> | SmF (Small nuclear ribonucleoprotein F) - spliceosomal snRNP protein                                                                                                                                                                       | 0.07 | 0.02 | 0.09 | 0.02 | >0.1  | 0.10 | 0.02 | >0.1  | 0.13 | 0.03 | 0.027 |          |                           |  |  |  |                                                                                  |                                       |     |
| 385 | 264 | <b>A12q43810</b> | SmF (Small nuclear ribonucleoprotein F) - spliceosomal snRNP protein                                                                                                                                                                       | 0.04 | 0.01 | 0.05 | 0.01 | >0.1  | 0.06 | 0.01 | >0.1  | 0.08 | 0.03 | 0.058 |          |                           |  |  |  |                                                                                  |                                       |     |
| 412 | 212 | <b>A14q29810</b> | MKK2 (MAP KINASE KINASE 2) - MKK2 regulates MPK6 and MPK4 in response to cold and salt stresses.                                                                                                                                           | 0.04 | 0.00 | 0.04 | 0.00 | >0.1  | 0.05 | 0.01 | >0.1  | 0.08 | 0.01 | 0.002 |          |                           |  |  |  |                                                                                  |                                       |     |

Total 75961 19870

# Supplemental Table 2

n 79 82  
Mean 962 242

## Selected peaks that change significantly in upf mutants and/or cycloheximide treatment where the change is <3%

| Primer pair | Band Size (bp) | Gene Identifier  | Gene name/function                                                                                                                                       | Wt mean | SE   | upf1-5 mean | SE   | p <=0.1 | upf3-1 mean | SE   | p <=0.1 | CHX mean | SE   | p <=0.1 | Transcript features | AS event                                          | PTC to pA                                                                                         | Auth stop to pA |
|-------------|----------------|------------------|----------------------------------------------------------------------------------------------------------------------------------------------------------|---------|------|-------------|------|---------|-------------|------|---------|----------|------|---------|---------------------|---------------------------------------------------|---------------------------------------------------------------------------------------------------|-----------------|
| 58          | 174            | <b>At5g65050</b> | MAF2 (MADS AFFECTING FLOWERING 2), AGL31 (AGAMOUS LIKE MADS-BOX PROTEIN 31) - transcription factor/ MADS box genes involved in control of flowering time | 0.00    | 0.00 | 0.00        | 0.00 | >0.1    | 0.01        | 0.00 | 0.003   | 0.00     | 0.00 | >0.1    | 7                   | PTC+; ds splice junctions                         | Predicted - Exon 3 skip; alt 3'ss in exon 5 removes 4 nt                                          |                 |
| 58          | 178            | <b>At5g65050</b> | transcription factor/ MADS box genes involved in control of flowering time                                                                               | 0.01    | 0.00 | 0.02        | 0.00 | 0.000   | 0.02        | 0.00 | 0.000   | 0.01     | 0.00 | 0.058   | 7                   | PTC+; ds splice junctions                         | Exon 3 skip                                                                                       |                 |
| 58          | 205            | <b>At5g65050</b> | MAF2 (MADS AFFECTING FLOWERING 2), AGL31 (AGAMOUS LIKE MADS-BOX PROTEIN 31) - transcription factor/ MADS box genes involved in control of flowering time | 0.01    | 0.00 | 0.01        | 0.00 | 0.056   | 0.01        | 0.00 | 0.006   | 0.01     | 0.00 | >0.1    | 7                   | PTC+; ds splice junctions                         | Predicted - alt 3'ss in exon 4 removes 33 nt; alt 3'ss in exon 5 removes 4 nt                     |                 |
| 58          | 351            | <b>At5g65050</b> | MAF2 (MADS AFFECTING FLOWERING 2), AGL31 (AGAMOUS LIKE MADS-BOX PROTEIN 31) - transcription factor/ MADS box genes involved in control of flowering time | 0.02    | 0.00 | 0.02        | 0.00 | >0.1    | 0.02        | 0.01 | >0.1    | 0.04     | 0.00 | 0.000   | 7                   | PTC+; ds splice junctions                         | Predicted - alt 5'ss in intron 2 adds 109 nt                                                      |                 |
| 58          | 347            | <b>At5g65050</b> | MAF2 (MADS AFFECTING FLOWERING 2), AGL31 (AGAMOUS LIKE MADS-BOX PROTEIN 31) - transcription factor/ MADS box genes involved in control of flowering time | 0.00    | 0.00 | 0.00        | 0.00 | >0.1    | 0.00        | 0.00 | >0.1    | 0.01     | 0.00 | 0.000   | 7                   | PTC+; ds splice junctions                         | Predicted - alt 5'ss in intron 2 adds 109 nt; alt 3'ss in exon 5 removes 4 nt                     |                 |
| 58          | 433            | <b>At5g65050</b> | MAF2 (MADS AFFECTING FLOWERING 2), AGL31 (AGAMOUS LIKE MADS-BOX PROTEIN 31) - transcription factor/ MADS box genes involved in control of flowering time | 0.00    | 0.00 | 0.01        | 0.00 | >0.1    | 0.01        | 0.00 | 0.044   | 0.01     | 0.00 | 0.011   | 7                   | PTC+; ds splice junctions                         | Predicted - alt 5'ss in intron 2 adds 109 nt; intron 3 retained; alt 3' ss in exon 5 removes 4 nt |                 |
| 58          | 437            | <b>At5g65050</b> | MAF2 (MADS AFFECTING FLOWERING 2), AGL31 (AGAMOUS LIKE MADS-BOX PROTEIN 31) - transcription factor/ MADS box genes involved in control of flowering time | 0.03    | 0.01 | 0.04        | 0.00 | >0.1    | 0.04        | 0.01 | >0.1    | 0.06     | 0.01 | 0.007   | 7                   | PTC+; ds splice junctions                         | Predicted - alt 5'ss in intron 2 adds 109 nt; intron 3 retained                                   |                 |
| 118         | 240            | <b>At2g02960</b> | Zinc finger (C3HC4-type RING finger) family protein                                                                                                      | 0.02    | 0.00 | 0.02        | 0.00 | >0.1    | 0.03        | 0.00 | 0.094   | 0.02     | 0.00 | >0.1    | 6                   | uORFs of 8 and 26 aas; 26 uORF overlaps auth AUG. | Predicted alt 3'ss in IVS1 adds 44 nt                                                             |                 |
| 193         | 279            | <b>At1g07350</b> | Pre-mRNA splicing factor - Transformer serine/arginine-rich ribonucleoprotein                                                                            | 0.01    | 0.00 | 0.02        | 0.00 | >0.1    | 0.03        | 0.00 | 0.005   | 0.03     | 0.00 | 0.002   | 7 or 8              | PTC+; ds splice junctions                         | Predicted - alt 3'ss and alt 5'ss in IVS4 adds 81nt of IVS4 to transcript                         |                 |
| 193         | 282            | <b>At1g07350</b> | Pre-mRNA splicing factor - Transformer serine/arginine-rich ribonucleoprotein                                                                            | 0.01    | 0.00 | 0.01        | 0.00 | 0.023   | 0.01        | 0.00 | 0.000   | 0.01     | 0.00 | 0.000   | 7 or 8              | PTC+; ds splice junctions                         | Predicted - alt 3'ss and alt 5'ss in IVS4 adds 84nt of IVS4 to transcript                         |                 |
| 237         | 123            | <b>At1g07830</b> | RPL29 - ribosomal protein L29 family protein                                                                                                             | 0.01    | 0.00 | 0.02        | 0.01 | 0.006   | 0.03        | 0.00 | 0.000   | 0.02     | 0.00 | >0.1    | 4                   | uORF of 31 aas overlaps with AUG of main ORF      | Alt 3'ss removes 70 nt of exon 2 (including authentic AUG)                                        |                 |
| 298         | 270            | <b>At5g09880</b> | RNA recognition motif (RRM)-containing protein                                                                                                           | 0.02    | 0.00 | 0.02        | 0.00 | >0.1    | 0.02        | 0.01 | 0.077   | 0.03     | 0.00 | 0.001   | 13                  | PTC+; ds splice junctions                         | Two alternative exons from IVS 4; alt 3'ss in exon 5 removes 29 nt                                |                 |
| 299         | 253            | <b>At5g11330</b> | Monooxygenase family protein                                                                                                                             | 0.00    | 0.00 | 0.00        | 0.00 | >0.1    | 0.01        | 0.00 | >0.1    | 0.01     | 0.00 | 0.002   | 4                   | PTC+; ds splice junctions                         | Alt 5'ss and alt 3'ss removes cryptic intron from exon 2 of 106 nt                                |                 |
| 299         | 289            | <b>At5g11330</b> | Monooxygenase family protein                                                                                                                             | 0.00    | 0.00 | 0.01        | 0.00 | 0.088   | 0.02        | 0.01 | 0.000   | 0.02     | 0.00 | 0.000   | 4                   | PTC+; ds splice junctions                         | Alt 5'ss and alt 3'ss removes cryptic intron from exon 2 of 70 nt                                 |                 |

Means and standard errors of ratios of up-regulated transcripts are given for wild-type, upf1-5, upf3-1 plants and plants treated with cycloheximide (CHX)

Green shading - significantly up-regulated with >3% change from wild-type; Blue shading - significantly up-regulated with <3% change from wild-type; pink - significantly down-regulated with >3% change from wild-type.

Abbreviations: PTC+ - PTC-containing transcripts; ds - downstream; uORF - upstream open reading frame; aas - amino acids; ss - splice site; alt - alternative; IVSn - intervening sequence = intron where n is the intron number;

Exon number: where two numbers are given, alternatively spliced transcripts include or exclude an alternative exon giving two possibilities.

**Table S3. List of alternatively spliced genes showing splice isoform upregulation upon inhibition of nonsense-mediated decay**

| Gene ID   | Gene Name                                                                                                                                                                             |
|-----------|---------------------------------------------------------------------------------------------------------------------------------------------------------------------------------------|
| At1g02090 | FUS5 (FUSCA 5), CSN7 (COP9 SIGNALOSOME SUBUNIT 7), COP15 (CONSTITUTIVE PHOTOMORPHOGENIC 15) - MAP kinase kinase/ phosphoprotein                                                       |
| At1g03457 | RNA-binding protein, putative                                                                                                                                                         |
| At1g04950 | TAF6 (TBP-ASSOCIATED FACTOR 6), TAFII59 (TATA BOX ASSOCIATED FACTOR II 59) - transcription initiation factor/ mutant is embryo lethal/ reduced pollen growth                          |
| At1g07350 | Pre-mRNA splicing factor - Transformer serine/arginine-rich ribonucleoprotein, putative                                                                                               |
| At1g07830 | RPL29 - ribosomal protein L29 family protein                                                                                                                                          |
| At1g15200 | Pinin - exon junction complex protein; protein-protein interaction regulator family protein                                                                                           |
| At1g16610 | SR45 (ARGININE/SERINE-RICH 45), RNPS1 - pre-mRNA splicing factor/ exon junction complex protein/ heterochromatic siRNA pathway/ involved in plant sugar response                      |
| At1g18660 | Zinc finger (C3HC4-type RING finger) family protein                                                                                                                                   |
| At1g23970 | Unknown protein                                                                                                                                                                       |
| At1g30200 | F-box family protein                                                                                                                                                                  |
| At1g37150 | HCS2 (HOLOCARBOXYLASE SYNTHETASE 2) - catalytic/ involved in protein modification - biotin-[acetyl-CoA-carboxylase] ligase activity                                                   |
| At1g49730 | Protein kinase family protein                                                                                                                                                         |
| At1g49950 | TRB1 - TELOMERE REPEAT BINDING FACTOR 1 - telomeric DNA binding protein/ DNA binding / transcription factor                                                                           |
| At1g54080 | UBP1A, OLIGOURIDYLATE-BINDING PROTEIN 1A - mRNA 3'-UTR binding                                                                                                                        |
| At1g54360 | TAF6B1/TAF6B2/TAF6B3/TAF6B4 (TBP-ASSOCIATED FACTOR 6B1) - similar to histone fold TBP-associated factor TAF6/ RNA polymerase II transcription factor/ transcription initiation factor |
| At1g55310 | SCL33, SR33 (SC35-like splicing factor 33) - pre-mRNA splicing factor/ SR protein/ RNA binding                                                                                        |
| At1g61660 | Basic helix-loop-helix (bHLH) family protein                                                                                                                                          |
| At1g64625 | Transcription factor                                                                                                                                                                  |
| At1g69250 | NTF2 (nuclear transport factor 2) family protein - RNA recognition motif (RRM)-containing protein                                                                                     |
| At1g72050 | TFIIIA (TRANSCRIPTION FACTOR IIIA) - zinc finger (C2H2 type) family protein/ required for transcription of 5S rRNA genes                                                              |
| At1g72320 | APUM23 (ARABIDOPSIS PUMILIO 23) - member of Pumilio RNA-binding protein family/ regulates mRNA stability and translation by sequence-specific binding to 3' UTR of target mRNAs       |
| At1g72560 | PSD, PAUSED - encodes a karyopherin/ ortholog of LOS1/XPOT/ tRNA binding/ mediates nuclear export of tRNAs                                                                            |
| At1g76460 | RNA recognition motif (RRM)-containing protein                                                                                                                                        |
| At1g77080 | FLM (FLOWERING LOCUS M), MAF1 (MADS AFFECTING FLOWERING 1) - MADS domain protein/flowering regulator/ transcription factor/ closely related to FLC                                    |
| At1g79880 | La domain-containing protein                                                                                                                                                          |
| At2g02570 | SPF30 - Nucleic acid binding                                                                                                                                                          |
| At2g02960 | Zinc finger (C3HC4-type RING finger) family protein                                                                                                                                   |
| At2g04790 | Unknown protein - similar to unnamed protein product [ <i>Vitis vinifera</i> ] (GB:CAO23994.1)                                                                                        |
| At2g15530 | zinc finger (C3HC4-type RING finger) family protein                                                                                                                                   |
| At2g16940 | RNA recognition motif (RRM)-containing protein                                                                                                                                        |
| At2g18300 | Basic helix-loop-helix (bHLH) family protein; transcription factor involved in response to cytokinin stimulus                                                                         |

|           |                                                                                                                                                                                                                                                                                                                                   |
|-----------|-----------------------------------------------------------------------------------------------------------------------------------------------------------------------------------------------------------------------------------------------------------------------------------------------------------------------------------|
| At2g21660 | ATGRP7 (GLYCINE-RICH RNA-BINDING PROTEIN 7), CCR2 (COLD-CIRCADIAN RHYTHM AND RNA BINDING 2) - RNA binding/ double-stranded DNA binding/ single-stranded DNA binding/ regulates circadian oscillations of GRP7/GRP8 transcript/ cold-induced/ response to salt and dehydration stress conditions/ mediates innate immune response. |
| At2g26150 | ATHSFA2 (Arabidopsis thaliana HEAT SHOCK TRANSCRIPTION FACTOR A2) - DNA binding/ Involved in response to misfolded protein accumulation in the cytosol                                                                                                                                                                            |
| At2g28550 | TOE1 (TARGET OF EAT1 1), RAP2.7 (RELATED TO AP2.7) - DNA binding/ transcription factor                                                                                                                                                                                                                                            |
| At2g29210 | Splicing factor PWI domain-containing protein                                                                                                                                                                                                                                                                                     |
| At2g30260 | U2B"(U2 SMALL NUCLEAR RIBONUCLEOPROTEIN B") - component of the U2 snRNP complex/ RNA binding                                                                                                                                                                                                                                      |
| At2g32330 | Unknown protein                                                                                                                                                                                                                                                                                                                   |
| At2g33480 | ANAC041 (NAC DOMAIN CONTAINING PROTEIN 41) - transcription factor                                                                                                                                                                                                                                                                 |
| At2g36010 | E2F3 (E2F TRANSCRIPTION FACTOR 3) - transcription factor/ cell cycle genes, key components of the cyclin D/retinoblastoma/E2F pathway.                                                                                                                                                                                            |
| At2g37060 | NF-YB8, NUCLEAR FACTOR Y, SUBUNIT B8                                                                                                                                                                                                                                                                                              |
| At2g37340 | RS2Z33, RSZ33 (ARGININE/SERINE-RICH ZINC KNUCKLE-CONTAINING PROTEIN 33) - pre-mRNA splicing factor/ SR protein/ nucleic acid binding / nucleotide binding / zinc ion binding                                                                                                                                                      |
| At2g38880 | NF-YB1 (NUCLEAR FACTOR Y SUBUNIT B1), HAP3A (HEME ACTIVATOR PROTEIN (YEAST) HOMOLOG 3A) - transcription factor/ confers drought tolerance                                                                                                                                                                                         |
| At2g40830 | RHC1A (RING-H2 finger protein C1A), putative - cell wall/ protein binding / zinc ion binding                                                                                                                                                                                                                                      |
| At2g43640 | SRP14, signal recognition particle 14 kDa family protein                                                                                                                                                                                                                                                                          |
| At2g43810 | SmF (Small nuclear ribonucleoprotein F) - spliceosomal snRNP protein                                                                                                                                                                                                                                                              |
| At2g46790 | APRR9 (PSEUDO-RESPONSE REGULATOR 9) - transcription regulator/clock function - essential to temperature-sensitive circadian system                                                                                                                                                                                                |
| At2g46830 | CCA1, CIRCADIAN CLOCK ASSOCIATED 1 - transcription factor/ Myb-like transcriptional repressor in regulating circadian rhythms/ binds evening element in TOC1 to repress TOC1                                                                                                                                                      |
| At3g01150 | PTB1 - POLYPYRIMIDINE TRACT-BINDING PROTEIN 1 - pre-mRNA splicing - role in pollen germination                                                                                                                                                                                                                                    |
| At3g01540 | DRH1 (DEAD BOX RNA HELICASE 1)                                                                                                                                                                                                                                                                                                    |
| At3g06510 | SFR2 (SENSITIVE TO FREEZING 2) - encodes protein with beta-glucosidase activity/ hydrolase - hydrolyzing O-glycosyl compounds/ freezing response                                                                                                                                                                                  |
| At3g07740 | ADA2A (HOMOLOG OF YEAST ADA2 2A) - DNA binding/ transcription factor/ transcriptional adaptor ADA2a that interacts with histone acetyltransferase GCN5 homolog and CBF1/ response to cold                                                                                                                                         |
| At3g10300 | Calcium-binding EF hand family protein                                                                                                                                                                                                                                                                                            |
| At3g12250 | TGA6 (TGA1a-related gene 6); DNA binding /basic leucine zipper transcription factor/ activation of SA-responsive genes factor                                                                                                                                                                                                     |
| At3g12570 | FYD - in chloroplast envelope                                                                                                                                                                                                                                                                                                     |
| At3g13224 | RNA recognition motif (RRM)-containing protein                                                                                                                                                                                                                                                                                    |
| At3g13570 | SCL30A (SC35-LIKE SPLICING FACTOR 30A) - pre-mRNA splicing factor/ SR protein/ RNA binding                                                                                                                                                                                                                                        |
| At3g14230 | RAP2.2 - member of the ERF (ethylene response factor) subfamily B-2 of ERF/AP2 transcription factor family/ DNA binding                                                                                                                                                                                                           |
| At3g16800 | PP2C (Protein phosphatase 2C), putative                                                                                                                                                                                                                                                                                           |
| At3g17090 | PP2C (Protein phosphatase 2C) family protein                                                                                                                                                                                                                                                                                      |
| At3g19840 | PRP40C - Pre-mRNA-processing protein 40C/ binds CTD of RNA polymerase II/ scaffold for RNA processing machineries/ FF domain-containing protein / WW domain-containing protein                                                                                                                                                    |
| At3g20270 | Lipid-binding serum glycoprotein family protein                                                                                                                                                                                                                                                                                   |
| At3g25840 | Protein kinase family protein                                                                                                                                                                                                                                                                                                     |



|           |                                                                                                                                                                                                                                              |
|-----------|----------------------------------------------------------------------------------------------------------------------------------------------------------------------------------------------------------------------------------------------|
| At3g29160 | AKIN11 (ARABIDOPSIS SNF1 KINASE HOMOLOG 11) - SNF1-related protein kinase - interacts with SCF subunit SKP1/ASK1 and 20S proteasome subunit PAD1                                                                                             |
| At3g46460 | UBC13 (UBIQUITIN-CONJUGATING ENZYME 13) - ubiquitin protein ligase                                                                                                                                                                           |
| At3g49430 | SR34A (SER/ARG-RICH PROTEIN 34A) - pre-mRNA splicing factor - SR protein                                                                                                                                                                     |
| At3g51880 | HMGB1 (HIGH MOBILITY GROUP B 1), NFD1 (NUCLEOSOME/CHROMATIN ASSEMBLY FACTOR D1) - transcription factor                                                                                                                                       |
| At3g53270 | Unknown protein - similar to unnamed protein product [ <i>Vitis vinifera</i> ] (GB:CAO65717.1); contains domain PTHR15131 (PTHR15131)                                                                                                        |
| At3g53500 | RS2Z32 - pre-mRNA splicing factor / SR protein/ nucleic acid binding                                                                                                                                                                         |
| At3g53570 | AFC1 (ARABIDOPSIS FUS3-COMPLEMENTING GENE 1) - member of LAMMER kinase (CDC2-related) subfamily/ activates STE12-dependent functions in yeast                                                                                                |
| At3g55460 | SCL30 (SC35-LIKE SPLICING FACTOR 30) - pre-mRNA splicing factor/ SR protein/ RNA binding                                                                                                                                                     |
| At3g61860 | RS31 (ARGININE/SERINE-RICH SPLICING FACTOR 31) - pre-mRNA splicing factor/ SR protein/ RNA binding                                                                                                                                           |
| At3g62190 | DNAJ heat shock N-terminal domain-containing protein                                                                                                                                                                                         |
| At4g02200 | Drought-induced-19-like 1 - drought-responsive family protein                                                                                                                                                                                |
| At4g02430 | SR34b - pre-mRNA splicing factor/ SR protein                                                                                                                                                                                                 |
| At4g14410 | basic helix-loop-helix (bHLH) family protein                                                                                                                                                                                                 |
| At4g16845 | VRN2 (REDUCED VERNALIZATION RESPONSE 2) - transcription factor/ mediates vernalization/ encodes zinc finger protein similar to Polycomb group (PcG) proteins/ maintains FLC repression cold treatment                                        |
| At4g23260 | CRK18 (CYSTEINE-RICH RLK [RECEPTOR-LIKE PROTEIN KINASE] 18 - cysteine-rich receptor-like protein kinase/ response to ABA                                                                                                                     |
| At4g24740 | AFC2 (ARABIDOPSIS FUS3-COMPLEMENTING GENE 2) - LAMMER kinase/ putative role in phosphorylation of SR protein splicing factors                                                                                                                |
| At4g25500 | RS40 - pre-mRNA splicing factor/ SR protein/ RNA binding (previously ATRSP35 [ <i>Arabidopsis thaliana</i> arginine/serine-rich splicing factor 35])                                                                                         |
| At4g26070 | MEK1 (MAP KINASE/ ERK KINASE 1), MKK1 (MITOGEN ACTIVATED PROTEIN KINASE KINASE 1) - MAP Kinase Kinase/ stress-activated MAPK pathway/ phosphorylates the MAPK AtMPK4 in response to stress/ phosphorylated by MEKK1 in response to wounding. |
| At4g27050 | F-box family protein                                                                                                                                                                                                                         |
| At4g27410 | RD26 (RESPONSIVE TO DESICCATION 26) - NAC transcription factor/ transcriptional activator in ABA-mediated dehydration response                                                                                                               |
| At4g29810 | MKK2 (MAP KINASE KINASE 2) - MKK2 regulates MPK6 and MPK4 in response to cold and salt stresses.                                                                                                                                             |
| At4g33060 | CYP57, Peptidyl-prolyl cis-trans isomerase cyclophilin-type family protein                                                                                                                                                                   |
| At4g34460 | AGB1 (GTP BINDING PROTEIN BETA 1), ELK4 (ERECTA-LIKE 4) - heterotrimeric G-protein beta subunit involved in organ shape/ nucleotide binding                                                                                                  |
| At4g35785 | Transformer serine/arginine-rich ribonucleoprotein; Nucleic acid binding / nucleotide binding                                                                                                                                                |
| At4g36690 | ATU2AF65A - spliceosomal protein/ RNA binding                                                                                                                                                                                                |
| At4g36960 | RNA recognition motif (RRM)-containing protein                                                                                                                                                                                               |
| At4g39260 | ATGRP8 ( GLYCINE-RICH RNA-BINDING PROTEIN 8), CCR1 (COLD-CIRCADIAN RHYTHM AND RNA BINDING 1) - regulates circadian oscillations of GRP7/GRP8 transcripts/ cold-induced/ RNA binding                                                          |
| At5g08185 | MIR162A, MICRORNA 162A - targets DCL1                                                                                                                                                                                                        |
| At5g09230 | SRT2 - member of SIR2 (sirtuin) family histone deacetylases (HDAC) - chromatin silencing/ DNA binding                                                                                                                                        |
| At5g09790 | ATXR5/SDG15 (SETDOMAIN GROUP 15) - contains SET-domain and PCNA-binding domain/ DNA binding/ possible role in cell-cycle regulation or progression.                                                                                          |

|           |                                                                                                                                                                                                                            |
|-----------|----------------------------------------------------------------------------------------------------------------------------------------------------------------------------------------------------------------------------|
| At5g09880 | RNA recognition motif (RRM)-containing protein                                                                                                                                                                             |
| At5g11200 | UAP56a - DEAD/DEAH box helicase - exon junction protein                                                                                                                                                                    |
| At5g11330 | Monoxygenase family protein                                                                                                                                                                                                |
| At5g13220 | JAS1 (JASMONATE-ASSOCIATED 1), JAZ10 (JASMONATE-ZIM-DOMAIN PROTEIN 10) - regulation of systemic acquired resistance/ response to jasmonic acid stimulus and wounding                                                       |
| At5g13730 | SIG4 (SIGMA FACTOR 4); DNA binding/ DNA-directed RNA polymerase/ transcription factor/ regulation of plastid-encoded RNA polymerase PEP                                                                                    |
| At5g13790 | AGL15 (AGAMOUS-LIKE 15) - DNA binding/ transcription factor/ member of the MADS domain family of regulatory factors                                                                                                        |
| At5g16820 | HSF3 (HEAT SHOCK FACTOR 3) - DNA binding / transcription factor/ not induced by heat/ required early in heat stress response                                                                                               |
| At5g18240 | MYR1 (MYB-RELATED PROTEIN 1) - transcription factor                                                                                                                                                                        |
| At5g18620 | CHR17 (CHROMATIN REMODELING FACTOR 17) - DNA-dependent ATPase                                                                                                                                                              |
| At5g20250 | DIN10 (DARK INDUCIBLE 10) - member of glycosyl hydrolase family 36/ hydrolyzing O-glycosyl compounds                                                                                                                       |
| At5g24270 | SOS3 (SALT OVERLY SENSITIVE 3), CBL4 (CALCINEURIN B-LIKE PROTEIN 4) - encodes a calcium sensor essential for K <sup>+</sup> nutrition, K <sup>+</sup> /Na <sup>+</sup> selectivity, and salt tolerance                     |
| At5g35410 | SOS2 (SALT OVERLY SENSITIVE 2), CIPK24 (CBL-INTERACTING PROTEIN KINASE 24) - kinase/ regulatory component controlling plant potassium nutrition                                                                            |
| At5g37055 | SEF (SERRATED LEAVES AND EARLY FLOWERING), SWC6 (homologue of yeast SWC6 protein) - conserved subunit of SWR1/SRCAP complex.                                                                                               |
| At5g41150 | RAD1, UVH1(ULTRAVIOLET HYPERSENSITIVE 1) - DNA repair/ confers resistance to UV radiation                                                                                                                                  |
| At5g43270 | SPL2 (SQUAMOSA PROMOTER BINDING PROTEIN-LIKE 2) - DNA binding / transcription factor/ controls correct development of lateral organs in association with shoot maturation in the reproductive phase (with SPL10 and SPL11) |
| At5g43910 | pfkB-type carbohydrate kinase family protein                                                                                                                                                                               |
| At5g46110 | APE2 - ACCLIMATION OF PHOTOSYNTHESIS TO ENVIRONMENT 2 - antiporter/ triose-phosphate transmembrane transporter/ involved in acclimation responses                                                                          |
| At5g47210 | Nuclear RNA-binding protein, putative                                                                                                                                                                                      |
| At5g50240 | PIMT2 (PROTEIN-L-ISOASPARTATE METHYLTRANSFERASE 2)                                                                                                                                                                         |
| At5g53180 | PTB2, POLYPYRIMIDINE TRACT-BINDING PROTEIN 2 - pre-mRNA splicing - role in pollen germination                                                                                                                              |
| At5g57630 | CIPK21 (CBL-INTERACTING PROTEIN KINASE 21), SNRK3.4 (SNF1-RELATED PROTEIN KINASE 3.4) - CBL-interacting protein kinase                                                                                                     |
| At5g59950 | Aly/REF - RNA and export factor-binding protein, putative                                                                                                                                                                  |
| At5g63120 | RH30 - ethylene-responsive putative DEAD box RNA helicase                                                                                                                                                                  |
| At5g65050 | MAF2 (MADS AFFECTING FLOWERING 2), AGL31 (AGAMOUS LIKE MADS-BOX PROTEIN 31) - transcription factor/ MADS box genes involved in control of flowering time                                                                   |
| At5g65060 | MAF3 - MADS AFFECTING FLOWERING 3 - MADS domain protein/flowering regulator/ transcription factor/ closely related to FLC                                                                                                  |
| At5g65070 | MAF4 - MADS AFFECTING FLOWERING 4 - MADS domain protein/flowering regulator/ transcription factor/ closely related to FLC                                                                                                  |
| At5g65080 | MAF5 (MADS AFFECTING FLOWERING 5)                                                                                                                                                                                          |
| At5g66010 | RNA binding protein                                                                                                                                                                                                        |
| At5g66210 | CPK28 (calcium-dependent protein kinase 28) - calmodulin-dependent protein kinase/ member of Calcium Dependent Protein Kinase family                                                                                       |

**Table S4. Comparison of the degree of change in NMD-sensitive AS transcripts between *upf3-1* and *upf1-5***

| <b>Groups of transcripts</b>       | <b>Number of up-regulated transcripts</b> |                      |                         |
|------------------------------------|-------------------------------------------|----------------------|-------------------------|
|                                    | <i>upf3-1&gt;upf1-5</i>                   | <i>upf3-1=upf1-5</i> | <i>upf1-5&gt;upf3-1</i> |
| <i>upf1-5/upf3-1/cycloheximide</i> | 32                                        | 0                    | 0                       |
| <i>upf1-5/upf3-1</i>               | 7                                         | 2                    | 1                       |
| <u>cycloheximide</u>               | 52                                        | 3                    | 6                       |
| <b>Total</b>                       | <b>91</b>                                 | <b>5</b>             | <b>7</b>                |

**Supplementary Table 5. Comparison of the degree of change in NMD-sensitive AS transcripts between CHX and *upf* mutants**

| <b>Groups of transcripts</b>       | <b>Number of up-regulated transcripts</b> |                 |
|------------------------------------|-------------------------------------------|-----------------|
|                                    | <i>upf</i> >CHX                           | CHX> <i>upf</i> |
| <i>upf1-5/upf3-1/cycloheximide</i> | 20                                        | 12              |
| <i>upf3-1/cycloheximide</i>        | 7                                         | 34              |
| <b>Total</b>                       | <b>27</b>                                 | <b>46</b>       |

**Supplemental Table 6. Intron retention transcripts which are NMD sensitive, not expected to be turned over by NMD or cryptic introns**

| Primer pair                                                                                        | Gene ID   | Name                                        | Exon No. | Primer sites | AS event                                 | Transcript           | wt   | <i>upf 1-5</i> | <i>upf 3-1</i> | NMD    |
|----------------------------------------------------------------------------------------------------|-----------|---------------------------------------------|----------|--------------|------------------------------------------|----------------------|------|----------------|----------------|--------|
| <b>Intron retention events not expected to be NMD - in frame introns</b>                           |           |                                             |          |              |                                          |                      |      |                |                |        |
| 314                                                                                                | At2g43410 | FPA                                         | 7        | Ex3-5        | FS                                       |                      | 0.34 | 0.31           | 0.31           |        |
|                                                                                                    |           |                                             |          |              | <b>IR4</b>                               | In frame             | 0.66 | 0.69           | 0.69           | No NMD |
| 360                                                                                                | At3g06510 | SFR2                                        | 10       | Ex5-7        | FS                                       |                      | 0.83 | 0.83           | 0.82           |        |
|                                                                                                    |           |                                             |          |              | <b>IR6</b>                               | In frame             | 0.12 | 0.09           | 0.07           | No NMD |
|                                                                                                    |           |                                             |          |              | E7 Alt 3'ss(+28)                         | PTC+; ds SJ          | 0.01 | <b>0.02</b>    | <b>0.04</b>    | NMD    |
|                                                                                                    |           |                                             |          |              | E7 Alt 3'ss(-7)                          | PTC+; ds SJ          | 0.02 | <b>0.04</b>    | <b>0.06</b>    | NMD    |
| <b>Intron retention events not expected to be NMD – 5'UTR intron with uORFs in all transcripts</b> |           |                                             |          |              |                                          |                      |      |                |                |        |
| 305                                                                                                | At1g01060 | LHY                                         | 10       | Ex1-3        | FS                                       |                      | 0.89 | 0.85           | 0.89           |        |
|                                                                                                    |           |                                             |          |              | <b>IR1 (5' UTR)</b>                      | uORFs                | 0.06 | 0.07           | 0.06           | No NMD |
| <b>Intron retention events not expected to be NMD – C-terminal change</b>                          |           |                                             |          |              |                                          |                      |      |                |                |        |
| 325                                                                                                | At2g47890 | Zn finger (B-box type) protein              | 4        | Ex1-4        | FS                                       |                      | 0.92 | 0.93           | 0.88           |        |
|                                                                                                    |           |                                             |          |              | <b>IR3</b>                               | C-terminal change    | 0.06 | 0.06           | 0.10           | No NMD |
| <b>Cryptic intron – splicing event not observed</b>                                                |           |                                             |          |              |                                          |                      |      |                |                |        |
| 353                                                                                                | At1g27770 | ACA1/PEA1                                   | 8        | Ex3-5        | FS                                       | Not observed         | 0.00 | 0.00           | 0.00           |        |
|                                                                                                    |           |                                             |          |              | <b>IR 3</b>                              | In frame             | 0.91 | 0.86           | 0.94           | No NMD |
| 361                                                                                                | At4g13850 | AtGRP2                                      | 6        | Ex3-6        | FS                                       | Not observed         | 0.00 | 0.00           | 0.00           |        |
|                                                                                                    |           |                                             |          |              | <b>IR5</b>                               | In frame             | 1.00 | 1.00           | 1.00           | No NMD |
| <b>Intron retention transcripts which are NMD sensitive</b>                                        |           |                                             |          |              |                                          |                      |      |                |                |        |
| 327                                                                                                | At5g59950 | Aly/REF protein                             | 5        | Ex1-3        | FS                                       |                      | 0.84 | 0.70           | 0.53           |        |
|                                                                                                    |           |                                             |          |              | <b>IR1</b>                               | PTC+; ds SJ          | 0.16 | <b>0.30</b>    | <b>0.47</b>    | NMD    |
| 332                                                                                                | At3g16800 | PP2C                                        | 6        | Ex1-3        | FS                                       |                      | 0.84 | 0.81           | 0.75           |        |
|                                                                                                    |           |                                             |          |              | <b>IR2</b> (IVS1 spliced to distal site) | PTC+; ds SJ          | 0.05 | <b>0.07</b>    | <b>0.10</b>    | NMD    |
|                                                                                                    |           |                                             |          |              | E2 Alt 3'ss(+18) (5' UTR)                |                      | 0.06 | 0.06           | 0.06           | No NMD |
|                                                                                                    |           |                                             |          |              | Unknown (399 bp)                         |                      | 0.05 | 0.06           | <b>0.09</b>    | NMD    |
| 374                                                                                                | At4g36960 | RRM-containing protein                      | 13       | Ex1-3        | FS                                       |                      | 0.84 | 0.74           | 0.61           |        |
|                                                                                                    |           |                                             |          |              | <b>IR1R (5' UTR)</b>                     | PTC+; uORF in 5' UTR | 0.05 | <b>0.15</b>    | <b>0.32</b>    | NMD    |
| 378                                                                                                | At3g62190 | DNAJ – N-terminal domain-containing protein | 6        |              | FS                                       |                      |      |                |                |        |
|                                                                                                    |           |                                             |          |              | <b>IR4</b>                               | PTC+; ds SJ          | 0.09 | <b>0.13</b>    | <b>0.16</b>    | NMD    |
